1 The phylogeography of westslope cutthroat trout

2

3

4 Michael K. Young<sup>1\*</sup>, Kevin S. McKelvey<sup>1</sup>, Tara Jennings<sup>2</sup>, Katie Carter<sup>2,4</sup>, Richard Cronn<sup>2</sup>,  
5 Ernest R. Keeley<sup>3</sup>, Janet L. Loxterman<sup>3</sup>, Kristine L. Pilgrim<sup>1</sup>, and Michael K. Schwartz<sup>1</sup>

6

7

8

9 <sup>1</sup>U.S. Forest Service, National Genomics Center for Wildlife and Fish Conservation, Rocky  
10 Mountain Research Station, 800 E. Beckwith Avenue, Missoula, MT 59801 USA

11 <sup>2</sup>U.S. Forest Service, Pacific Northwest Research Station, 3200 SW Jefferson Way, Corvallis,  
12 OR 97331 USA

13 <sup>3</sup>Department of Biological Sciences, Idaho State University, 921 S. 8th Avenue, Mail Stop 8007,  
14 Pocatello, ID 83209 USA

15 <sup>4</sup>Current address: Department of Horticulture, Oregon State University, Corvallis, OR 97331  
16 USA

17

18 \*Corresponding author: [mkyoung@fs.fed.us](mailto:mkyoung@fs.fed.us); 1.406.542.3254

19

20 Keywords: distinct population segments, phylogeny, evolutionarily significant units,  
21 microsatellites, mitochondrial, mtDNA, *Oncorhynchus clarkii lewisi*, SNP

22

23 Abstract.-Identifying units of conservation of aquatic species is fundamental to informed natural  
24 resources science and management. We used a combination of mitochondrial and nuclear  
25 molecular methods to identify potential units of conservation of westslope cutthroat trout, a  
26 taxon native to montane river basins of the northwestern U.S. and southwestern Canada.  
27 Mitogenomic sequencing identified two major lineages composed of nine monophyletic clades,  
28 and a well-supported subclade within one of these, largely delineated by river basins. Analyses  
29 of microsatellites and single nucleotide polymorphisms corroborated most of these groupings,  
30 sometimes with less resolution but demonstrating more complex connections among clades. The  
31 mitochondrial and nuclear analyses revealed that Pleistocene glacial cycles profoundly  
32 influenced the distribution and divergence of westslope cutthroat trout, that this taxon crossed the  
33 Continental Divide in two separate events, and that genetically pure but nonindigenous fish were  
34 widely distributed. Herein, we recognize nine geographically discrete, cytonuclear lineages  
35 largely circumscribed by major river basins as potential units of conservation: 1) John Day; 2)  
36 Coeur d'Alene; 3) St. Joe; 4) North Fork Clearwater; 5) Salmon; 6) Clearwater headwaters; 7)  
37 Clearwater-eastern Cascades; 8) neoboreal, consisting of most of the Columbia upstream from  
38 central Washington, the Fraser in British Columbia, and the South Saskatchewan in Alberta; and  
39 9) Missouri.

40

41

---

42 If the biota, in the course of aeons, has built something we like but do not understand, then who  
43 but a fool would discard seemingly useless parts? To keep every cog and wheel is the first  
44 precaution of intelligent tinkering.

45

—Aldo Leopold (1953)

46

47

48

49 Leopold's (1953) admonition has long served as a core paradigm of conservation biology. In  
50 his time, the focus was on preserving species, but species often comprise distinct lineages that go  
51 by many names—subspecies, distinct population segments, evolutionarily significant units,  
52 operational taxonomic units, or stocks—and constitute potential units of conservation (Avice  
53 2000) that can be accorded taxonomic or legal standing, e.g., under the U.S. Endangered Species  
54 Act (Waples 1991) or Canada's Species at Risk Act (Mee et al. 2015). Historically, evidence for  
55 the presence of these lineages was largely based on variation in morphology, behavior, life  
56 history, or ecology, usually associated with a geographically discrete distribution, but  
57 increasingly sophisticated molecular tools have revolutionized their identification and spawned a  
58 branch of science dedicated to their study, phylogeography (Avice 2000). There is particular  
59 urgency to identify units of conservation for aquatic ectotherms such as fishes, mussels, crayfish,  
60 and amphibians. These aquatic groups are disproportionately represented among at-risk taxa  
61 (Williams et al. 2011), and shifts in climate are beginning to alter their distributions (Comte and  
62 Grenouillet 2013; Eby et al. 2014). Correctly inferring the existence and extent of lineages within  
63 a taxon also relies on an understanding of the geological and climatic histories of current and  
64 former habitats. For aquatic species, especially fishes in western North America, this means  
65 appreciating the variation in hydrological connections over evolutionary timescales (McPhail and  
66 Lindsey 1986; Minckley et al. 1986), particularly with respect to the influence of Pleistocene  
67 glaciations on hydrologic networks (Bernatchez and Wilson 1998). A robust intraspecific  
68 phylogeny also demands that a taxon be sampled across its entire range with sufficient intensity  
69 to represent all potential units of conservation, and be examined with tools of sufficient  
70 sensitivity to recognize them (Heath et al. 2008). It also requires awareness of the potential for  
71 human-assisted relocation of nonlocal fish populations (Metcalf et al. 2012; Pritchard et al.  
72 2015).

73 The systematics and distribution of cutthroat trout (*Oncorhynchus clarkii*) have been a source  
74 of contention since the species was first formally described in the 19<sup>th</sup> century (Richardson  
75 1836). Various forms have been described as full species or as subspecies with little regard to  
76 previous work (Thorgaard et al., this volume), and the origin and affiliation of some type  
77 specimens has been obscure (Metcalf et al. 2012). Moreover, our understanding of the historical  
78 distributions of putative taxa is far from perfect, in part because of the broad-scale husbandry and  
79 translocation of some forms of cutthroat trout (Wiltzius 1985) and the rapid extirpation of others

80 (Young and Harig 2001). A valiant attempt to resolve this ambiguity was made by the  
81 preeminent taxonomist of the 20<sup>th</sup> century on western North American trout, Robert Behnke,  
82 who divided cutthroat trout into 14 extant and 2 extinct subspecies (Behnke 1992). Among these  
83 subspecies was the westslope cutthroat trout *O. c. lewisi*, first observed by Lewis and Clark in  
84 1805 at the eventual type location, the Great Falls of the Missouri River (Girard 1856). Primarily  
85 relying on morphological evidence, Behnke (1992) asserted that the cutthroat trout of the interior  
86 Columbia River basin also represented this subspecies, an observation broadly corroborated by  
87 phylogenetic work (Leary et al. 1987; Wilson and Turner 2009; Loxterman and Keeley 2012;  
88 Houston et al. 2012). Whether there is substantial phylogenetic diversity within this taxon across  
89 its range, however, has not been resolved. Because of the absence of substantial morphological  
90 differences among westslope cutthroat trout in different river basins, the U.S. Fish and Wildlife  
91 Service concluded that the taxon constituted a single unit of conservation in response to a  
92 petition for listing under the U.S. Endangered Species Act (U.S. Fish and Wildlife Service 2003).  
93 Yet subsequent molecular studies indicated the presence of marked geographic divergence  
94 within westslope cutthroat trout (Drinan et al. 2011; Loxterman and Keeley 2012) that was likely  
95 driven by the complex geological and climatic history of the region (McPhail and Lindsey 1986).

96 Although Behnke (1992) was uncertain about the ultimate source of the lineage that led to  
97 westslope cutthroat trout, he posited that most of its present distribution could be attributed to  
98 events during the Wisconsinan glaciation 100–15 ka ago. He proposed that major waterfalls  
99 developed during this time in the Pend Oreille, Spokane, and Kootenai River basins that may  
100 have isolated westslope cutthroat trout upstream. Thereafter, the Clark Fork River basin served  
101 as the source for fish dispersing—across divides via stream capture—to the east and north to the  
102 upper Missouri River and South Saskatchewan River basins in Montana, Wyoming, and Alberta  
103 and to the south to the Clearwater and Salmon River basins in Idaho. He postulated that outwash  
104 floods from Glacial Lake Missoula carried westslope cutthroat trout to disjunct river basins along  
105 the eastern face of the Cascade Range in Washington and to the John Day River basin in Oregon,  
106 and may have been an alternate route for populations that colonized the Clearwater and Salmon  
107 River basins. Recession of continental glaciers, along with the temporary proglacial lakes at their  
108 trailing edges, presumably permitted westslope cutthroat trout to colonize waters farther north in  
109 western Montana, northern Idaho, southern British Columbia, and southern Alberta.

110 Our goal was to test this phylogeographic hypothesis (cf. Crisp et al. 2011). We did so by  
111 assessing the phylogenetic structure of westslope cutthroat trout across the bulk of its historical  
112 distribution, with an additional aim to identify and geographically delineate potential units of  
113 conservation, using a combination of mitochondrial and nuclear molecular information on  
114 different samples of westslope cutthroat trout, including those used to establish hatchery  
115 broodstocks.

116

## 117 **Methods**

### 118 *The historical range and its geological history*

119 The historical range of westslope cutthroat trout is thought to constitute portions of the Fraser,  
120 South Saskatchewan, Missouri, and Columbia River basins (Shepard et al. 2005; McPhail 2007;  
121 Figure 1). Its presence in the Fraser River basin in British Columbia is limited to a few  
122 headwater streams (McPhail 2007), whereas it once occupied most of the tributaries in the Bow  
123 River and Oldman River basins, part of the South Saskatchewan River basin in Alberta (Yau and  
124 Taylor 2013; Fisheries and Oceans Canada 2014). In the Missouri River basin, its range was  
125 thought to include the main stem and most tributaries from the Judith River to the headwaters,  
126 excluding those blocked by waterfalls (e.g., the Sun River basin above present-day Gibson  
127 Dam). In the upper Columbia River basin, the historical range includes 1) the entire Pend Oreille  
128 and Kootenai River basins in British Columbia, Idaho, Montana, and Washington; 2) scattered  
129 populations in the Kettle River basin in British Columbia (McPhail 2007) and presumably  
130 Washington; 3) the Spokane River basin above Spokane Falls, primarily in Idaho, and perhaps  
131 the Sanpoil River basin in Washington (Trotter et al. 2001b). Along the eastern Cascades,  
132 westslope cutthroat trout are found from the Methow River basin in the north to the Yakima  
133 River basin in the south, although there is uncertainty with respect to whether it is indigenous to  
134 these and all intervening basins (Trotter et al. 1999, 2001a). In Oregon, westslope cutthroat trout  
135 are present in tributaries of the main-stem and North Fork John Day River, but believed to be  
136 introduced to the latter (Gunckel 2002). Westslope cutthroat trout are also native to the bulk of  
137 two large river basins in the Snake River in Idaho, the Clearwater and Salmon, but are curiously  
138 absent from all other basins tributary to the Snake River in Oregon, Washington, and Idaho  
139 (except where introduced; Neville and Dunham 2011). Although the four major basins are  
140 presently hydrologically isolated, they were presumably connected in the distant or recent past.

141 For example, the upper Columbia and Missouri Rivers were connected by the dual outlets of a  
142 lake at Marias Pass in Montana until 1913, when the Union Pacific Railroad diverted all flow to  
143 a tributary of the Two Medicine River of the Missouri River basin (Schultz 1941).

144 The modern distribution has been substantially reduced because of habitat alteration and  
145 introductions of nonnative species (Shepard et al. 2005). Moreover, hatchery strains of westslope  
146 cutthroat trout have been widely introduced throughout the 20<sup>th</sup> century and could affect both the  
147 phylogenetic interpretation and evolutionary integrity of wild populations. Three broodstocks are  
148 commonly used at present. In Montana, the primary broodstock was developed from fish in the  
149 upper Flathead and middle Clark Fork River basins (Drinan 2010). In Idaho, westslope cutthroat  
150 trout were domesticated from populations in the Priest River basin, as was the King's Lake  
151 broodstock in Washington (Crawford 1979; M. Campbell, Idaho Department of Fish and Game,  
152 personal communication). A second broodstock in Washington, Twin Lakes, was presumably  
153 developed from fish collected in the Lake Chelan basin or Methow or Wenatchee River basins  
154 (Crawford 1979).

155 The interior Columbia River basin constitutes the western portion of the distribution of  
156 westslope cutthroat trout and has been present in some form for at least 15 Ma, roughly the age  
157 of the lineage representing cutthroat trout and rainbow trout *O. mykiss* (Stearley and Smith  
158 2016). The eruption and deposition of flood basalts from the mid-Miocene to the Pliocene led to  
159 repeated re-routing and re-entrenchment of the major tributaries (Fecht et al. 1985). This  
160 coincided with the orogeny of the Cascade Range, whereas the topography of the headwaters  
161 was set by the orogeny of the Rocky Mountains 60 Ma earlier (Alt and Hyndman 1995). The  
162 Pleistocene was characterized by the cyclic advance and retreat of the Cordilleran and Laurentide  
163 ice sheets, which buried northerly portions of the current range of westslope cutthroat trout under  
164 hundreds of meters of ice. The repeated advance of the Purcell lobe of the Cordilleran ice sheet  
165 near Sandpoint, Idaho also led to the damming of the Clark Fork River and filling of Glacial  
166 Lake Missoula (Waitt 1985). The repeated failure of this ice dam led to catastrophic jökulhlaups  
167 lasting 1–2 weeks in which the discharge from the draining glacial lake temporarily exceeded  
168 that of all rivers on Earth combined. These glacial outburst floods, perhaps up to 100 at multi-  
169 decadal intervals during the Wisconsinan glaciation (Booth et al. 2003) and an unknown number  
170 from earlier Pleistocene glacial intervals (Bader et al. 2016), produced the Columbia Basin  
171 scablands. The scablands are characterized by floodwater-scoured surfaces, deep sedimentary

172 deposits from temporary ponding as water backed up at topographic chokepoints, e.g., Wallula  
173 Gap in Washington, and huge nickpoints in many river channels that resulted in waterfalls likely  
174 to constitute migration barriers to aquatic taxa, e.g., Spokane Falls on the Spokane River,  
175 Palouse Falls on the Palouse River, Metalline Falls on the Pend Oreille River, and falls on many  
176 lesser basins (Waite 1985). The Okanagan and Columbia River lobes of this ice sheet also led to  
177 the formation of Glacial Lake Columbia, which at its highstand extended upstream to the Purcell  
178 lobe and portions of the Coeur d'Alene and St. Joe River valleys (Atwater 1987; Hanson and  
179 Clague 2016). Contemporaneous mountain glaciers (Pierce 2003) would have forced headwater  
180 taxa to lower portions of many watersheds to escape habitats that were cold, turbid, and  
181 unproductive. Similar conditions—rerouted and glacially derived streams and temporary glacial  
182 lakes—prevailed in the upper Missouri River basin. Until the Pleistocene (and perhaps during  
183 portions of it), the Missouri River drained northward to Hudson Bay (Howard 1958). By the Last  
184 Glacial Maximum 23–19 ka ago (Hughes et al. 2013), the Laurentide ice sheet had forced the  
185 Missouri River south to near its present course within the Mississippi River basin. As that ice  
186 sheet retreated, it created a series of proglacial lakes (Alden 1932; Colton et al. 1961) that  
187 persisted as recently as 11.5 ka ago (Davis et al. 2006) and may have served as springboards for  
188 colonization by aquatic taxa farther north. The retreating Cordilleran ice sheet also left a trail of  
189 temporary lakes that could have served as stepping stones for aquatic species to colonize basins  
190 farther north, such as the Fraser River (McPhail and Lindsey 1986).

191 Two other major events in the history of the Columbia River basin merit attention. About 3  
192 Ma ago, the Columbia River captured the Snake River, which previously drained farther south to  
193 the Klamath or Sacramento River basins (Wood and Clemens 2002; Stearley and Smith 2016).  
194 Although the connection between the Snake River and lower Columbia River did not promote  
195 extensive faunal transfer (at least of salmonids), it did provide a route for another Pleistocene  
196 flood: the draining of Lake Bonneville. Unlike the ice dam failures of Glacial Lake Missoula,  
197 Lake Bonneville drained by overtopping and rapidly downcutting at Red Rock Pass 17.5 ka ago  
198 (Amidon and Clark 2015; Oviatt 2015), delivering 4,750 km<sup>3</sup> of water in what represents the  
199 largest (by volume) known freshwater flood (O'Connor 1993). Like those of Glacial Lake  
200 Missoula, this flood backed up many of the tributary rivers and may have conveyed aquatic  
201 species across large distances. Because it was less violent and longer lasting—a couple months  
202 to one year (Malde 1968; Jarrett and Malde 1987)—the draining of Lake Bonneville may been

203 more conducive to fish survival and translocation. Interpreting its possible phylogeographic  
204 effect is difficult because it was both preceded and followed by outwash floods from Glacial  
205 Lake Missoula, the last of which was 14.7 ka ago (Waitt 1985; McDonald et al. 2012; Balbas et  
206 al. 2017), with additional floods still later from smaller proglacial lakes that formed as the  
207 Purcell lobe of the Cordilleran ice sheet retreated (Waitt et al. 2009; Peters 2012) and perhaps  
208 from the longer-persisting Glacial Lake Columbia (Balbas et al. 2017).

209

### 210 *Conservation units*

211 We define units of conservation (sensu distinct population segments; Waples 1991) as  
212 populations or groups thereof that are substantially reproductively isolated and that constitute an  
213 important component of the evolutionary legacy of a species. Ideally, units of conservation  
214 would be identified based on an array of phylogenetically informative ecological, life history,  
215 morphological, and genetic characteristics (Fraser and Bernatchez 2001). Variation in  
216 morphology has been related to ecotypic differences in westslope cutthroat trout (Seiler and  
217 Keeley 2009), and such differences have been shown to have a genetic basis and contribute to  
218 identifying units of conservation in some salmonids (Keeley et al. 2007). To our knowledge,  
219 however, there has been no comparison of morphological or ecological traits across the entire  
220 range of westslope cutthroat trout (cf. Bestgen et al. 2013). In addition, relative to other Pacific  
221 salmon and trout, cutthroat trout are ecological generalists capable of expressing a wide array of  
222 life history strategies (Young 1995; Waples et al. 2001), rendering these characteristics less  
223 definitive for delineating units of conservation. Given this background of uncertainty, we used  
224 well-supported, reciprocally monophyletic mitochondrial clades (Moritz et al. 1995) as working  
225 hypotheses about the units of conservation within westslope cutthroat trout, particularly when  
226 geographic structuring reinforced those distinctions. We also sought support from analyses of  
227 two suites of nuclear markers to corroborate the mitochondrial results.

228

### 229 *Laboratory analyses*

230 We obtained three sets of genetic information from two groups of samples of westslope  
231 cutthroat trout: 1) mitogenomic sequences of specimens from most of the historical range in the  
232 U.S. and Canada ( $n = 96$  fish); 2) allele frequencies of 10 microsatellite loci (Vu and Kalinowski  
233 2009) in the aforementioned specimens (save one from Buck Creek, WA, sample 44); and 3)



234 allele frequencies of 52 variable nuclear single nucleotide polymorphisms (SNPs) from  
235 specimens collected across a large portion of the U.S. range ( $n = 524$  fish from 55 sites; Table 1;  
236 Figure 1). Specimens from wild populations that were representative of those used to establish  
237 each of the hatchery broodstocks were included in one or both sample groups. Some of the sites  
238 in the first two analyses also had additional individuals analyzed using SNPs ( $n = 29$ ), but spatial  
239 overlap in these datasets was not complete.

240 Whole genomic DNA was extracted from tissue samples using the QIAGEN DNeasy Tissue  
241 Kit (Qiagen, Valencia, CA, USA). Extracts were converted into indexed genomic libraries using  
242 the Illumina TruSeq DNA HT kit (version 2). To enrich samples for mitochondrial DNA targets,  
243 we developed hybridization-enrichment baits based on the complete mitochondrial genome  
244 sequence for Lahontan cutthroat trout *O. c. henshawi* (NCBI accession AY886762). Baits and  
245 blocking probes were designed and synthesized by MYcroarray, LLC (version 2; Ann Arbor,  
246 MI), and hybridization-enrichment reactions followed their protocol with a 12-cycle final  
247 amplification. Enriched libraries were pooled to 48-plex and sequenced using two lanes of 101-  
248 base-pair, single-end reads on the Illumina HiSeq2000 at the Center for Genome Research and  
249 Biocomputing at Oregon State University (<http://cgrb.oregonstate.edu/>). Indices were  
250 demultiplexed using CASAVA v. 1.8.2, and individual sample mitochondrial genomes were  
251 assembled using the *O. c. henshawi* reference and the CLC-Bio v. 7.0 assembler, with the  
252 following quality and alignment parameters: quality score limit of 0.05, maximum number of  
253 ambiguities per read = 2; mismatch cost = 3, indel cost = 3, indel open cost = 6, indel extend cost  
254 = 1, length and similarity fraction = 0.95, and non-specific matches mapped randomly.  
255 Individual samples were represented by an average of 3.674 million microreads (minimum =  
256 281,755; maximum = 13,176,436); for assembly, we used a maximum of 4 million reads per  
257 sample. Short read sequences from this study are available under BioProject ID PRJNA389467  
258 from National Center for Biotechnology Information.

259 In the microsatellite analysis, we conducted analyses of 10 loci used in previous studies  
260 of westslope cutthroat trout: OclMSU14, OclMSU15, OclMSU17, OclMSU21, OclMSU23,  
261 OclMSU24, OclMSU25, OclMSU27, OclMSU30, OclMSU33 (Vu and Kalinowski 2009; Drinan  
262 et al. 2011). The reaction volume (10  $\mu$ l) contained 1.0  $\mu$ l DNA, 1 $\times$  reaction buffer (Applied  
263 Biosystems), 2.0 mM MgCl<sub>2</sub>, 200  $\mu$ M of each dNTP, 1  $\mu$ M reverse primer, 1  $\mu$ M dye-labeled  
264 forward primer, 1.5 mg/ml BSA, and 1U Taq polymerase (Applied Biosystems). The PCR

265 profile was 94 °C/5 min, [94 °C/1 min, 55 °C/1 min, 72 °C/30 s] × 40 cycles. The resultant  
266 products were visualized on a LI-COR DNA analyzer (LI-COR Biotechnology).

267 For the SNP analyses, we used Competitive Allele Specific PCR (KASPar) assays  
268 (KBiosciences, Hoddesdon, Herts, England) to amplify 52 variable nuclear loci (Harwood and  
269 Phillips 2011; Kalinowski et al. 2011; Amish et al. 2012; Campbell et al. 2012; Pritchard et al.  
270 2012). We used a suite of 44 diagnostic SNP alleles to ensure no fish introgressed with rainbow  
271 trout or Yellowstone cutthroat trout *O. c. bowieri* alleles were included in the analysis  
272 (McKelvey et al. 2016). The PCR touchdown profile contained an initial annealing temperature  
273 of 65 °C and decreased by 0.80 °C per cycle until most cycles ran at 57 °C. We visualized PCR  
274 products on an EP1 Reader (Fluidigm) and determined individual genotypes using Fluidigm SNP  
275 Genotyping Software.

276

### 277 *Phylogenetic analyses*

278 We conducted phylogenetic analyses on the three aforementioned sources of data, plus a  
279 fourth, to assess intraspecific diversity in westslope cutthroat trout.

280 Mitogenomic sequences were aligned in MAFFT version 7 (Katoh and Standley 2013),  
281 followed by minor manual adjustments. We used MitoAnnotator (Iwasaki et al. 2013) to order  
282 and identify gene regions. We followed Satoh et al. (2016) and the mitotRNAdb database  
283 (<http://mtrna.bioinf.uni-leipzig.de/mtDataOutput/>) to identify paired and unpaired regions in  
284 rRNAs and tRNAs and evaluate whether nucleotide insertions or deletions were likely to  
285 represent genotyping errors; we subsequently made 12 adjustments to the 1.6 million nucleotides  
286 in the dataset. Unique haplotypes were identified using DAMBE version 6 (Xia 2017) and used  
287 to construct neighbor-joining and maximum-likelihood phylogenetic trees. To portray  
288 evolutionary distances among and between clades, we used MEGA 7.0 (Kumar et al. 2016) to  
289 construct a neighbor-joining tree based on the MCL model with gamma-distributed evolutionary  
290 rates and some invariant positions, bootstrapped 1,000 times. We included sequences from  
291 Lahontan cutthroat trout, greenback cutthroat trout *O. c. stomias*, and rainbow trout as outgroups  
292 (GenBank accessions NC006897, KP013107, KP013117, KP013084, DQ288268–71,  
293 KP085590). Pairwise genetic distances (as a percentage) between samples and groups were  
294 based on the number of nucleotide differences. For the maximum-likelihood analysis, we used  
295 PartitionFinder 2.0 (Lanfear et al. 2016) to select the best-fitting partitioning scheme as

296 measured by AICc, constrained to the suite of evolutionary models considered by RAxML  
297 (Stamatakis 2014) and excluding all outgroups. Data subsets included 1) codon position by gene  
298 for the protein-coding genes (39 subsets); 2) paired and unpaired regions among tRNAs and the  
299 origin of replication for the light strand (2 subsets) and between rRNAs (4 subsets); 3) intergenic  
300 spacers and the non-coding portions of the control region (1 subset); and 4) conserved sequence  
301 blocks of the control region, nucleotides coding for more than one gene, and tRNA anticodons (1  
302 subset). Because RAxML will only consider a single evolutionary model for the entire suite of  
303 partitions, we then compared AICc scores among maximum likelihood models using the GTR  
304 and GTRGAMMA evolutionary models, and chose the model with the best score. We then ran  
305 RAxML version 8.1.21 implemented through the RAxMLGUI (Silvestro and Michalak 2012)  
306 and set for rapid bootstrapping (1,000 bootstraps) and a thorough ML search. We recognized  
307 potential units of conservation as reciprocally monophyletic clades with > 70% bootstrap support  
308 in the mitogenomic maximum-likelihood phylogeny. We did not single out subclades therein  
309 with high levels of support unless: 1) they differed from all other subclades by more than the  
310 average intra-clade divergence (0.04%) or 2) they had been previously recognized as a potential  
311 unit of conservation, i.e., fish in the Missouri River basin (Drinan et al. 2011).

312 Further evaluation of these clades as potential units of conservations was undertaken by  
313 analyzing a dataset combining all ND2 sequences of westslope cutthroat trout from Loxterman  
314 and Keeley (2012) and one additional specimen in GenBank ( $n = 93$ , accessions EU186799,  
315 JQ747580–596; Table 1) with those examined in the mitogenomic analyses (including the  
316 outgroups). Some of these specimens ( $n = 26$ ) were used in both analyses, reducing the number  
317 of unique specimens ( $n = 163$ ). We built a neighbor-joining tree using unpartitioned data  
318 bootstrapped 1,000 times in MEGA 7.0, for which the Tamura-Nei model with gamma-  
319 distributed rates was the best-fitting evolutionary model based on AICc scores.

320 Because the microsatellites and variable SNPs for westslope cutthroat trout were developed  
321 (Campbell et al. 2012) almost entirely from specimens representing the two most northeasterly  
322 and least genetically divergent clades identified in the mitogenomic analysis in the Missouri,  
323 Kootenai, and Clark Fork River basins, ascertainment bias was more likely to prevent the  
324 phylogenetic tree topology from representing the species tree (Lachance and Tishkoff 2013) but  
325 less likely to incorrectly assign individuals to groups (Bradbury et al. 2011). Consequently, we  
326 evaluated whether putative groups identified in STRUCTURE 2.3.4 (Hubisz et al. 2009), using

327 either the microsatellite or SNP datasets, matched those of the best-supported clades in the  
328 mitogenomic analyses. We applied settings recommended by Falush et al. (2003) for detecting  
329 subtle population subdivision by using the admixture model, correlated allele frequencies among  
330 populations, and an allele frequency distribution parameter ( $\lambda$ ) set to 1. We allowed STRUCTURE  
331 to infer the value of the model's Dirichlet parameter ( $\alpha$ ) for the degree of admixture from the  
332 data. In the SNP analysis, we used  $K = 15$  (the number of major river basins) as the maximum  
333 number of potential groups and completed 20 replicate runs for each value of  $K$ . In the  
334 microsatellite analysis, we used  $K = 10$  (the number of mitogenomic clades) as the maximum  
335 number. In both analyses, we set the burn-in period to 100,000 MCMC repetitions and the post-  
336 burn-in period to 100,000, ignoring the user-defined population-of-origin or sampling location  
337 for each individual (i.e., adopting non-informative priors). We attempted to identify an optimal  
338 value of  $K$  by calculating the maximum likelihood value and  $\Delta K$  (Evanno et al. 2005) using the  
339 program STRUCTURE HARVESTER (Earl and vonHoldt 2012).

340 Stocking of genetically pure westslope cutthroat trout was inferred from the appearance of  
341 mitochondrial haplotypes outside their river basin of origin, or of individuals in nuclear analyses  
342 that assigned to groups related to those that founded the primary broodstocks in Idaho and  
343 Montana. For Montana, we regarded samples from the South Fork Flathead River (sample codes  
344 35, 94, and 179; Table 1) as representative of broodstock genotypes. Samples from the Priest  
345 River basin (codes 24, 137, and 138) were deemed to represent fish from the Idaho broodstock,  
346 as well as the King's Lake broodstock in Washington. The Falls Creek sample (code 60)  
347 represented Washington's Twin Lakes broodstock, but these genotypes were not found outside  
348 the eastern Cascades river basins.

349

## 350 **Results**

### 351 *Mitochondrial analyses*

352 Hybridization-capture probes allowed us to enrich mitochondrial genome sequences to a very  
353 high level (mean mitochondrial representation = 57.5% of all sequences), resulting in  
354 mitochondrial genome assemblies represented by extremely high mean depth (range: 997—  
355 20,208 reads), and complete coverage for all positions in the genome. Complete mitogenomes  
356 (16,676 nucleotides) included 13 protein-coding genes, 2 rRNAs, 22 tRNAs, and several  
357 noncoding regions (Table 2), and revealed 89 haplotypes among the 96 specimens. The

358 mitogenomic maximum-likelihood phylogeny recovered two main lineages (mean difference  
359 between lineages based on number of nucleotide differences, 0.42%; mean difference within  
360 lineages, 0.06–0.11%) that contained nine highly supported, monophyletic clades and one  
361 subclade (Figure 2; Table 3). The topology and levels of support in the mitogenomic neighbor-  
362 joining analysis were effectively identical (results not shown). One lineage (hereafter, the  
363 southern lineage) contained six clades (1–5b) largely associated with individual river basins: the  
364 John Day River (1) in Oregon; the upper Coeur d’Alene (2) and St. Joe Rivers (3) in the Spokane  
365 River basin in Idaho; the North Fork Clearwater River (4) in Idaho; and the lower and middle  
366 Salmon River (5a) and upper Salmon River (5b) in Idaho. The latter two clades, however,  
367 overlapped geographically within the basin. The four clades (6–9) in the other main lineage (the  
368 northern lineage) were less geographically circumscribed: the Clearwater headwaters (6), which  
369 included specimens from the upper Selway and South Fork Clearwater Rivers in Idaho; the  
370 Clearwater-eastern Cascades (7), with representatives from tributaries to the Middle Fork  
371 Clearwater River in Idaho and from the Wenatchee River, Lake Chelan, and Methow River  
372 basins on the eastern side of the Cascade Range in Washington; and a neoboreal (8) clade, which  
373 included all river basins in Alberta, British Columbia, Montana, northern Idaho, and northeastern  
374 Washington. Most of these constitute basins that were covered by continental ice sheets or the  
375 proglacial lakes at their margins. Disjunct representatives of this clade, however, were found in  
376 the Salmon, Clearwater, and Spokane River basins in Idaho. Also recovered in these analyses  
377 was a well-supported subclade within the neoboreal group that represented all specimens (save  
378 one) from the Missouri River (9) basin in Montana.

379 The analysis of ND2 sequences from fish genotyped for this study and from public databases  
380 had 27 haplotypes, including 8 not observed in the mitogenomic analysis (Table 1). Consistent  
381 with the previous analysis, the ND2 neighbor-joining tree resolved the two main lineages and  
382 recovered similar geographic structure (Figures 3), but with less resolution and support of  
383 additional clades despite greater geographic coverage. This analysis diagnosed the John Day,  
384 Coeur d’Alene, and St. Joe River clades, and grouped but did not distinguish among the North  
385 Fork Clearwater and Salmon River specimens. It also pooled all Clearwater River and eastern  
386 Cascade specimens, and did not resolve Missouri River specimens as a distinct group within the  
387 neoboreal clade.

388

389 *Nuclear analyses*

390 In the STRUCTURE analysis of SNPs, measures of the optimal number of groups were not  
391 concordant. The log-likelihood estimate peaked at the maximum number of groups ( $K = 15$ )  
392 whereas  $\Delta K$  identified  $K = 2$  as the optimum number of clusters. Given this outcome, we  
393 examined how assignment to groups changed across the entire range of values (Figure 4 depicts  
394  $K = 4, 8, \text{ and } 15$ ). The intermediate value ( $K = 8$ ) was equivalent to the number of mitogenomic  
395 clades geographically represented in the SNP analysis (samples equivalent to the North Fork  
396 Clearwater River and Clearwater River headwater samples were not available). Although these  
397 results broadly corroborated the mitogenomic classification, there were important differences.  
398 Specimens from the John Day River were the first group to be segregated as distinct (at  $K = 3$ ).  
399 Specimens from the Salmon River formed a distinct group at intermediate and higher levels of  $K$ ,  
400 as did those from the Missouri River. The Clearwater River and eastern Cascades clade grouped  
401 at the lower levels of  $K$ , but split into distinct clusters at the highest levels of resolution. More  
402 complex were patterns among the Coeur d'Alene River, St. Joe River, and neoboreal clades.  
403 Specimens from the Coeur d'Alene and St. Joe Rivers largely assigned to a single group at all  
404 levels of  $K$ , but this group also included specimens from the neoboreal clade from the lower  
405 Clark Fork, Pend Oreille, and lower Kootenai River basins for lower levels of  $K$ . The rest of the  
406 neoboreal clade tended to split along major watershed boundaries at higher levels of  $K$ ,  
407 particularly the upper Kootenai River.

408 In the microsatellite analyses,  $K = 5$  (Figure 5) had the largest log-likelihood estimate and the  
409 third-highest  $\Delta K$  (which peaked at  $K = 2$ ). The smaller sample sizes in this analysis afforded less  
410 resolution but nonetheless highlighted groups consistent with those identified previously: 1) the  
411 John Day and Clearwater Rivers and eastern Cascades basins; 2) the Salmon River; 3) the Coeur  
412 d'Alene and St. Joe Rivers, some samples from the Pend Oreille and lower Kootenai Rivers, one  
413 from downstream on the Columbia River, and one from the Fraser River; 4) the Clark Fork and  
414 upper Kootenai Rivers in the Columbia basin and the Oldman and Bow Rivers in the South  
415 Saskatchewan basin; and 5) the Missouri River.

416

417 *Stocked fish*

418 The genotypes of one or more fish at as many as 18 sites were suspected of being influenced  
419 by introductions of nonintrogressed but nonindigenous westslope cutthroat trout (Table 4). The

420 bulk of these observations were from Idaho, and involved the appearance of mitochondrial  
421 haplotypes typical of the neoboreal group in the Salmon and Clearwater River basins. Although  
422 we regarded specimens with neoboreal haplotypes in the St. Joe and Coeur d'Alene River basins,  
423 primarily from the lowermost portions of both basins, as being nonindigenous, this interpretation  
424 in uncertain. Fish with either the neoboreal or southern haplotypes tended to share a nuclear  
425 genotype that was also typical of fish found farther north in the Pend Oreille, lower Clark Fork,  
426 lower Kootenai, middle Columbia, and Fraser River basins. Thus, the St. Joe or Coeur d'Alene  
427 River specimens may have been indigenous representatives of fish that colonized basins to the  
428 north, including that from which Idaho's broodstock was derived, rather than reflect recent  
429 introductions of that hatchery stock. In Montana, the two likely examples of nonindigenous  
430 specimens were from disparate parts of the Missouri River basin that harbored fish having  
431 mitochondrial or nuclear genotypes akin to those from west of the Continental Divide.

432

### 433 **Discussion**

434 The phylogeographic structure of westslope cutthroat trout is consistent with unglaciated  
435 basins serving as refugia during glacial cycles, followed by extensive colonization from some of  
436 those refugia during interglacial intervals (Bernatchez and Wilson 1998; Hampe and Petit 2005).  
437 The deepest divergence among populations involved the John Day, Salmon, Clearwater, and  
438 Spokane River basins, which were south of the maximum advance of the Cordilleran ice sheet.  
439 Much lower levels of divergence characterized areas formerly occupied by the ice sheets or the  
440 glacial lakes at their margins, collectively represented by the neoboreal mitogenomic clade (and  
441 including the Missouri River basin). Although we have foregone estimating dates of divergence  
442 among clades, much of the diversity seems to be associated with recent climatic events. The  
443 radiation following the Last Glacial Maximum likely reflects the divergence within most  
444 mitogenomic clades (mean, 0.04%), whereas previous interglacials over 100 ka ago may have  
445 led to divergence between the Coeur d'Alene and St. Joe River clades, the neoboreal and the  
446 Clearwater-eastern Cascade clades, and the North Fork Clearwater and Salmon River clades, and  
447 still older events to the split between the southern and northern major lineages. Continental  
448 glaciation during previous glacial maxima is likely to have extirpated groups that advanced  
449 northward during earlier interglacial intervals. That all samples from the previously glaciated  
450 area form a single mitogenomic clade suggests that no individuals representing earlier colonizers

451 are present in this area. Below, we consider the phylogeographic relevance of these river basins  
452 to westslope cutthroat trout in more detail.

453 The clade in the John Day River basin, though clearly a member of the southern major  
454 lineage, exhibited the greatest divergence from all other groups. This watershed constitutes the  
455 downstreammost extent of westslope cutthroat trout in the Columbia River basin and is separated  
456 from the next nearest populations in the eastern Cascade Range in Washington by hundreds of  
457 kilometers, and by hundreds more from the nearest members of the southern lineage in the  
458 Clearwater and Salmon Rivers in Idaho. There has been uncertainty with regard to whether these  
459 fish were indigenous or introduced from Montana, Idaho, or Washington (Gunckel 2002), but the  
460 evidence indicates that these fish constitute a distinct, relictual population of westslope cutthroat  
461 trout that did not arrive via glacial outwash floods from upstream. Whether their distribution  
462 extends to the North Fork John Day River basin, which also supports westslope cutthroat trout  
463 but for which there are extensive records of stocking of this taxon (Gunckel 2002), has not been  
464 evaluated. As alluded to earlier, the absence of westslope cutthroat trout from nearby basins in  
465 southeastern Washington and northeastern Oregon with abundant suitable habitat is somewhat  
466 surprising. That westslope cutthroat trout may have been present, however, is hinted at by the  
467 presence of their mitochondrial haplotype among anadromous rainbow trout in at least one area,  
468 the Tucannon River in Washington (Brown et al. 2004), although unrecorded stocking of  
469 westslope cutthroat trout is a plausible alternative explanation.

470 The Salmon River basin constitutes a modern stronghold for westslope cutthroat trout  
471 (Shepard et al. 2005). It also hosts two relatively divergent mitogenomic clades of the southern  
472 lineage which are found exclusively in this basin. Nevertheless, the clades are geographically  
473 interspersed and showed little differentiation in the nuclear analyses. Their origin may have  
474 reflected isolation in different parts of the Salmon River basin during a previous glacial interval  
475 followed by subsequent mixing. Their nearest relatives appear to be fish found in the North Fork  
476 Clearwater River to the north, but whether these groups represent descendants of one another or  
477 of simultaneous divergence in these different locations is uncertain.

478 The Clearwater River basin in Idaho constitutes a biodiversity hotspot for westslope cutthroat  
479 trout. It hosts a geographically complex mixture of members of both primary mitogenomic  
480 lineages and four of the 10 mitogenomic clades of westslope cutthroat trout, two of which are  
481 endemic (and a third may be introduced). Its position beyond the southerly extent of the



482 Cordilleran ice sheet, combined with its relatively low elevation and high precipitation, seems to  
483 have contributed to the basin being a refugium for disjunct or locally endemic populations of an  
484 array of plant and animal taxa during the Last Glacial Maximum (summarized in Shafer et al.  
485 2010). That does not suggest that all portions of the basin were amenable to westslope cutthroat  
486 trout throughout this or earlier glacial cycles. Pollen core records from near the headwaters  
487 indicate a cold, arid climate with vegetation dominated by sagebrush, and that western red cedar  
488 *Thuja plicata*, currently a dominant forest overstory species typical of mesic, montane  
489 environments, did not colonize the basin until the last 5 ka (Herring and Gavin 2015). Moreover,  
490 mountain glaciers would have been prevalent in the higher ranges, constraining westslope  
491 cutthroat trout to the lower portions of many watersheds until conditions permitted them to  
492 colonize these areas, perhaps from multiple locations within the basin.

493 A remarkably close relationship between the populations in the eastern Cascade Range in  
494 Washington and those in Clearwater River basin—especially the Lochsa River basin—in Idaho  
495 is supported in all analyses. This enigmatic pattern raises questions about how westslope  
496 cutthroat trout crossed the majority of the lower Snake and middle Columbia River basins in  
497 recent geological time and in which direction. The simplest explanation would be stocking of the  
498 Twin Lakes broodstock from Washington in the Clearwater River in Idaho, but there are no  
499 records to support this (Evan Brown, Idaho Department of Fish and Game, personal  
500 communication). There is, however, evidence of the disjunct distribution of undescribed species  
501 of sculpins in central Idaho basins and along the eastern Cascade Range (M. Young, unpublished  
502 data). Given that the modern distribution of these sculpins does not include lacustrine or large,  
503 warm riverine environments, it is more likely that they, and thus westslope cutthroat trout, were  
504 transported downstream from central Idaho to their present distribution in central Washington.  
505 The limited divergence in westslope cutthroat trout haplotypes between these locations also  
506 indicates that this transfer was recent, and may have involved the emptying of Lake Bonneville  
507 or the last of the Glacial Lake Missoula outburst floods.

508 The major forks of the Spokane River basin are the Coeur d'Alene and St. Joe Rivers. In their  
509 headwaters, these basins harbor distinct clades that are nonetheless sister to one another and  
510 represent the southern lineage of westslope cutthroat trout. A comparable pattern of relatedness  
511 and divergence was evident in the cedar sculpin *Cottus schitsuumsh*, a recently described species  
512 that is largely confined to the Spokane River basin (LeMoine et al. 2014). The lower portions of

513 both the Coeur d'Alene and St. Joe Rivers, however, also hosted members of the mitogenomic  
514 neoboreal clade. Fish from throughout both basins shared a nuclear genotype that also appeared  
515 in fish farther north in the middle Columbia, Pend Oreille, lower Kootenai, lower Clark Fork  
516 River, and Fraser River basins, all presently unconnected to the Spokane River basin. The pattern  
517 could have arisen from 1) stocking of fish from the Priest River basin, the source of Idaho's  
518 broodstock, throughout the upper Spokane River basin, for which there is some evidence (Table  
519 4); or 2) ephemeral connections associated with fluctuating levels of proglacial lakes that  
520 promoted northerly expansion of genotypes from the Spokane River basin. As noted earlier,  
521 Glacial Lake Columbia reached tens of kilometers up the Coeur d'Alene and St. Joe River  
522 valleys and would have facilitated the movement of fish between these basins. This would also  
523 have provided access to the Pend Oreille basin across the low divide in Rathdrum Prairie in  
524 northern Idaho. Much of this watershed was subjected to the extreme conditions associated with  
525 the repeated, catastrophic drainage of Glacial Lake Missoula, but Glacial Lake Columbia  
526 persisted for some time after the last of these floods (Balbas et al. 2017). As the Purcell trench  
527 lobe of the Cordilleran ice sheet receded, it would have exposed the lower Kootenai River valley  
528 but blocked drainage to the north, diverting streams from that area through the trench cut by the  
529 Purcell lobe and connecting the lower Kootenai and Pend Oreille basins (Langer et al. 2011).  
530 Another connection between these basins appears to have existed at the low divide between the  
531 Bull River (lower Clark Fork) and Bull Lake (lower Kootenai) in Montana (Langer et al. 2011).  
532 Each of these connections would have provided access to fish originating from the Spokane  
533 River basin, which may have culminated in their reaching the Fraser River basin via the  
534 succession of glacial lakes trailing the receding ice sheet. That a fish from that basin was  
535 assigned to a microsatellite group representing fish from the upper Spokane River basin argues  
536 for such a connection.

537 Yet it is also clear that these fish—or this particular wave of colonizers—did not found the  
538 modern populations of westslope cutthroat trout inhabiting the Kootenai River above Kootenai  
539 Falls or the Clark Fork River above present-day Noxon Dam or Thompson Falls. All these fish  
540 constitute a single mitogenomic clade with a broadly shared nuclear genotype that suggests a  
541 limited number of founding individuals or a limited number of sources. Whatever their origin,  
542 this is now the most widely distributed clade of westslope cutthroat trout, and one that also  
543 displays substantial internal structure. For example, the nuclear data (e.g., SNP STRUCTURE plots

544 for  $K = 2-6$ ) indicate historical connections between populations in upper Kootenai and Flathead  
545 River basins, for which there are a number of plausible pathways that might have existed  
546 depending on the timing of recession of particular lobes of the Cordilleran ice sheet, the presence  
547 or absence of terminal or lateral moraines that affected drainage patterns, or the existence of  
548 multiple outlets of lakes near drainage divides, e.g., between the Little Bitterroot (Flathead), Big  
549 Thompson (Clark Fork), and Fisher (upper Kootenai) Rivers, or the Stillwater (Flathead) and  
550 Tobacco (upper Kootenai) Rivers.

551 There is also evidence that these fish not only colonized two additional major river basins  
552 across the Continental Divide—the Missouri and South Saskatchewan Rivers—but that these  
553 appear to be independent events. Based on our results and on earlier studies (Drinan et al. 2011),  
554 the Missouri River clade is a recent derivative of the widely distributed neoboreal clade, likely  
555 founded from a single source; all individuals share two diagnostic mutations in the mitogenome  
556 (one each in tRNA for tyrosine and the control region). The nuclear data imply that their closest  
557 relatives are those in the upper Flathead River basin. A likely route is via the Middle Fork  
558 Flathead River and Nyack Creek to Summit Creek, thence to the Two Medicine River basin and  
559 the rest of the Missouri River basin. This invasion was likely to have coincided with the  
560 lingering presence of glacial lakes formed by the Laurentide ice sheet because the Two Medicine  
561 River is tributary to the Marias River, which presently flows into the Missouri River well  
562 downstream of the Great Falls of the Missouri. Because the falls constitute a barrier to upstream  
563 fish migration, this location was likely inundated by a glacial lake (e.g., Glacial Lake Great Falls  
564 had a highstand of 1200 m [Calhoun 1906], about 250 m higher than the river elevation at the  
565 falls) which would have enabled westslope cutthroat trout to access the Missouri River  
566 headwaters. Furthermore, the lack of genetic divergence (mean distance 0.01%, with several  
567 geographically distant pairs of samples with identical mitogenomic haplotypes) among westslope  
568 cutthroat trout in this basin also indicates that their recent arrival may be their first. The upper  
569 Missouri River basin was not covered by the Laurentide Ice Sheet during any portion of the  
570 Pleistocene, thus suitable habitat for cutthroat trout should have persisted throughout much of  
571 this period and permitted greater divergence. That westslope cutthroat trout did not extend their  
572 distribution to the Yellowstone River basin, where Yellowstone cutthroat trout are found, points  
573 to the absence of a migration corridor via the lower Missouri and Yellowstone Rivers for either  
574 subspecies when they colonized. That a single clade of sculpins *Cottus* sp. (Young et al. 2013;

575 M. Young, unpublished data) and of mountain whitefish *Prosopium williamsoni* (Whiteley et al.  
576 2006) co-occur with both subspecies in these areas, however, demonstrates that interbasin  
577 exchanges were possible at an earlier time.

578 The westslope cutthroat trout of Alberta in the South Saskatchewan River basin appear to  
579 have arrived via a different route. They share mitogenomic affinities with fish of the Clark Fork  
580 River basin upstream from Thompson Falls and lack the diagnostic mutations seen in the fish  
581 from the Missouri River basin. The microsatellite analyses also group these fish with those in the  
582 upper Clark Fork River, not with those from the Missouri River. That the invasions of the South  
583 Saskatchewan and upper Missouri River basins were independent events is also supported by the  
584 distribution of bull trout *Salvelinus confluentus*, a cold-water salmonid with similar habitat  
585 preferences, which are present in the former and absent from the latter (Ardren et al. 2011).  
586 Moreover, westslope cutthroat trout may have been constrained to a limited portion of the South  
587 Saskatchewan River basin. Their current distribution includes only the Bow and Oldman River  
588 basins (Fisheries and Oceans Canada 2014), and Marnell (1988) argued that they were  
589 historically absent from Waterton Lakes and the Belly River and crossed the Continental Divide  
590 farther north. Based on topography, a plausible route would have been via the Kootenay River to  
591 Summit Lake in British Columbia, thence to Crowsnest Lake in Alberta, which is part of the  
592 Oldman River basin.

593 Based on our combined analyses, we find evidence for nine units of conservation within this  
594 taxon (Table 5). We acknowledge that different interpretations of the importance of modern-day  
595 isolation, administrative boundaries, ecoregions, or geographic mixing of genotypes (Mee et al.  
596 2015) could alter this total. For example, a reasoned case can be made that fish representing the  
597 neoboreal clade in the lower Kootenai, lower Clark Fork, Pend Oreille, middle Columbia, and  
598 Fraser River basins should be classified separately from those found elsewhere because their  
599 nuclear genotypes are distinct. Similarly, one could contend that fish in the eastern Cascades in  
600 Washington are distinct from those in the Clearwater River basin in Idaho based on geographic  
601 isolation and different administrative authorities. Such arguments are valid, thus we consider our  
602 estimate an initial hypothesis to be revised following additional sampling and more  
603 comprehensive analyses, but would be cautious about divisions at much smaller scales. Leary et  
604 al. (1988) reported that the bulk of genetic variation in westslope cutthroat trout in Montana was  
605 partitioned among individual populations, and consequently advocated for saving as many

606 populations as possible to preserve the genetic legacy of this taxon. The substantial structuring of  
607 headwater populations has been observed elsewhere among westslope cutthroat trout (Taylor et  
608 al. 2003; Young et al. 2004) and other salmonid species (Ryman 1983; Wenburg and Bentzen  
609 2001; Pritchard et al. 2009), though it may be an artifact of the widespread anthropogenic  
610 isolation of headwater trout populations (Campbell et al., this volume). In contrast, our data (also  
611 see Drinan et al. 2011) representing nearly the entire range of westslope cutthroat trout  
612 demonstrates that the primary divisions within this taxon arise at broader spatial scales, roughly  
613 conforming to major watershed boundaries and cycles of Pleistocene glaciation, which is  
614 consistent with hypotheses about rangewide genetic structure in temperate zone species (Hampe  
615 and Petit 2005). Although we concur with the intent to save as many populations as possible, the  
616 larger groups we identified are more likely to satisfy criteria for recognizing units of  
617 conservation (Waples 1991; Mee et al. 2015).

618 Our data and that of others confirms that the westslope cutthroat trout constitutes a coherent  
619 taxon that may warrant recognition as a full species. The level of divergence within westslope  
620 cutthroat trout (0.39% in a 640-bp fragment of cytochrome c oxidase subunit I (COI), the  
621 barcode region) is comparable to that of other species of fishes (0.36%) worldwide (Ward 2009),  
622 whereas its divergence (1.25% in the COI fragment, 1.11% across the mitogenome) from its  
623 nearest relative (Lahontan cutthroat trout) attains or exceeds that of many species pairs (April et  
624 al. 2011). Nonetheless, substantial uncertainties remain with regard to the placement of  
625 westslope cutthroat trout within the overall cutthroat trout lineage. Our mitogenomic analyses  
626 affirmed that westslope cutthroat trout haplotypes are highly divergent from those of rainbow  
627 trout (4.80% across the mitogenome), and more similar to Lahontan cutthroat trout than to  
628 greenback cutthroat trout (1.58%), but there is little consensus among the different genomic  
629 regions. Others have suggested that westslope cutthroat trout may be most closely related to  
630 rainbow trout based on variation in isozyme alleles (Leary et al. 1987), to coastal cutthroat trout  
631 based on karyotypes or morphology (Loudenslager and Gall 1980; Behnke 1992), to Lahontan  
632 cutthroat trout based on mitochondrial gene sequences (Wilson and Turner 2009; Loxterman and  
633 Keeley 2012), either of the latter two based on analyses of Y chromosomes (Brunelli et al. 2013),  
634 and to all three based on a panel of variable nuclear SNP markers (Houston et al. 2012). That  
635 each analysis supports a different relationship may be more indicative of the relative strengths  
636 and weaknesses of different markers than of an ambiguous phylogeny. For example, allozymes

637 can grossly and unpredictably underestimate haplotype variation (Buth 1984). The karyotype  
638 analysis was conducted on a sample of five westslope cutthroat trout from one hatchery  
639 broodstock (Loudenslager and Gall 1980) and its results contradict those of an earlier study with  
640 specimens from elsewhere (Simon and Dollar 1963). Both studies could be correct because  
641 geographical variation in chromosomal characteristics or multiple karyotypes within populations  
642 are common (Thorgaard 1983). Mitochondrial sequences form the basis of a multitude of  
643 projects to identify animal species (Ratnasingham and Herbert 2013), but introgression and  
644 reticulate evolution among lineages weaken relationships based solely on mitochondrial data  
645 (Taylor and Harris 2012). And all genetic analyses are vulnerable to incomplete geographic  
646 sampling, and the geographic origin and ancestry of specimens used to develop nuclear markers  
647 and diagnostic phenotypes can undermine phylogenetic inferences because of ascertainment bias  
648 (Lachance and Tishkoff 2013) or environmentally driven selection. Given the relative youth of  
649 cutthroat trout lineages, more intensive and representative sampling of the nuclear genome and  
650 of populations likely to be indigenous will be required to resolve this issue.

651 Although our work represents the most comprehensive effort to describe the phylogeography  
652 of westslope cutthroat trout, many details have yet to be resolved. Locations represented by one  
653 or two individuals would benefit from more thorough sampling to reveal the distribution and  
654 mixing of presumptive haplotypes and the discovery of new ones, such as in the John Day River  
655 (and its presumably stocked North Fork) in Oregon, the eastern Cascade River basins in  
656 Washington, and many portions of the Clearwater River in Idaho. Westslope cutthroat trout in  
657 the Yakima River basin are of unknown provenance, whether related to lineages in the John Day,  
658 the eastern Cascades (as implied in Figure 1), or to one as yet undescribed. Similarly, additional  
659 work to delineate hatchery stocks using nuclear markers would clarify the extent to which  
660 introgression of introduced forms affects indigenous populations, and would help avoid the use  
661 of introduced forms when attempting to establish basin-specific stocks. Despite these  
662 uncertainties, the phylogeographic patterns we have observed are concordant with the varying  
663 connections among river basins in the intermountain West throughout the late Pleistocene. These  
664 patterns can be used as a foundation to understand phylogeographic structure in other freshwater  
665 taxa, albeit with an awareness of the nuances associated with the long evolutionary history of  
666 cutthroat trout in western North America.

667

668 **Acknowledgements**

669 We thank M. Small of the Washington Department of Fish and Wildlife and J. Neal of the  
670 Oregon Department of Fish and Wildlife for contributing samples. T. Cross of the Rocky  
671 Mountain Research Station assisted with the STRUCTURE analysis of SNPs, and D. Horan helped  
672 prepare Figure 1. Comments by Kurt Fausch and two anonymous reviewers markedly improved  
673 the manuscript. This work was funded by the RIM Board of the U.S. Forest Service's Region 1,  
674 the Rocky Mountain Research Station, and the Pacific Northwest Research Station.

675

676 **References**

- 677 Alden WC (1932) Physiography and glacial geology of eastern Montana. U.S. Geological  
678 Survey Professional Paper 174.
- 679 Alt DD, Hyndman DW (1995) Northwest exposures: a geologic story of the Northwest.  
680 Mountain Press, Missoula, MT.
- 681 Amidon WH, Clark AC (2015) Interaction of outburst floods with basaltic aquifers on the Snake  
682 River Plain: Implications for Martian canyons. *Geological Society of America Bulletin*, **127**,  
683 688–701.
- 684 Amish SJ, Hohenlohe PA, Painter S, Leary RF, Muhlfeld C, Allendorf FW, Luikart G (2012)  
685 RAD sequencing yields a high success rate for westslope cutthroat and rainbow trout species-  
686 diagnostic SNP assays. *Molecular Ecology Resources*, **12**, 653–660.
- 687 April J, Mayden RL, Hanner RH, Bernatchez L (2011) Genetic calibration of species diversity  
688 among North America's freshwater fishes. *Proceedings of the National Academy of Sciences*,  
689 **108**, 10602–10607.
- 690 Ardren WR, DeHaan PW, Smith CT, Taylor EB, Leary R, Kozfkay CC, Godfrey L, Diggs M,  
691 Fredenberg W, Chan J, Kilpatrick CW (2011) Genetic structure, evolutionary history, and  
692 conservation units of bull trout in the coterminous United States. *Transactions of the*  
693 *American Fisheries Society*, **140**, 506–525.
- 694 Atwater BF (1987) Status of glacial Lake Columbia during the last floods from glacial Lake  
695 Missoula. *Quaternary Research*, **27**, 182–201.
- 696 Avise JC (2000) Phylogeography: the history and formation of species. Harvard University  
697 Press, Cambridge.
- 698 Bader NE, Spencer PK, Bailey AS, Gastineau KM, Tinkler ER, Pluhar CJ, Bjornstad BN (2016)  
699 A loess record of pre-Late Wisconsin glacial outburst flooding, Pleistocene  
700 paleoenvironment, and Irvingtonian fauna from the Rulo site, southeastern Washington, USA.  
701 *Palaeogeography, Palaeoclimatology, Palaeoecology*, **462**, 57–69.
- 702 Balbas AM, Barth AM, Clark PU, Clark J, Caffee M, O'Connor J, Baker VR, Konrad K,  
703 Bjornstad B (2017) <sup>10</sup>Be dating of late Pleistocene megafloods and Cordilleran Ice Sheet  
704 retreat in the northwestern United States. *Geology*. doi: 10.1130/G38956.1.
- 705 Behnke RJ (1992) Native trout of western North America. American Fisheries Society,  
706 Bethesda, Maryland.



- 707 Bernatchez L, Wilson CC (1998) Comparative phylogeography of Nearctic and Palearctic fishes.  
708 *Molecular Ecology*, **7**, 431–452.
- 709 Bestgen KR, Rogers KB, Granger R (2013) Phenotype predicts genotype for lineages of native  
710 cutthroat trout in the Southern Rocky Mountains. Final Report to U. S. Fish and Wildlife  
711 Service, Colorado Field Office, Denver Federal Center (MS 65412), Denver, CO. Larval Fish  
712 Laboratory Contribution 177.
- 713 Booth DB, Troost KG, Clague JJ, Waitt RB (2003) The cordilleran ice sheet. *Developments in*  
714 *Quaternary Sciences*, **1**, 17–43.
- 715 Bradbury IR, Hubert S, Higgins B, Bowman S, Paterson IG, Snelgrove PV, Morris CJ, Gregory  
716 RS, Hardie DC, Borza T, Bentzen P (2011) Evaluating SNP ascertainment bias and its impact  
717 on population assignment in Atlantic cod, *Gadus morhua*. *Molecular Ecology Resources*,  
718 **11(s1)**, 218–225.
- 719 Brown KH, Patton SJ, Martin KE, Nichols KM, Armstrong R, Thorgaard GH (2004) Genetic  
720 analysis of interior Pacific Northwest *Oncorhynchus mykiss* reveals apparent ancient  
721 hybridization with westslope cutthroat trout. *Transactions of the American Fisheries Society*,  
722 **133**, 1078–1088.
- 723 Brunelli JP, Mallatt JM, Leary RF, Alfaqih M, Phillips RB, Thorgaard GH (2013) Y  
724 chromosome phylogeny for cutthroat trout (*Oncorhynchus clarkii*) subspecies is generally  
725 concordant with those of other markers. *Molecular Phylogenetics and Evolution*, **66**, 592–  
726 602.
- 727 Buth DG (1984) The application of electrophoretic data in systematic studies. *Annual Review of*  
728 *Ecology and Systematics*, **15**, 501–522.
- 729 Calhoun FHH (1906) The Montana lobe of the Keewatin ice sheet. U.S. Geological Survey  
730 Professional Paper 50.
- 731 Campbell MR, Keeley ER, Kozfkay CC, Loxterman JL, Evans PR, Shiozawa DK (this volume)  
732 Describing and preserving the diversity of cutthroat trout in the Yellowstone River, Snake  
733 River and Bonneville Basins. Chapter 12. Evolutionary biology and taxonomy of cutthroat  
734 trout. American Fisheries Society, Bethesda, Maryland.
- 735 Campbell NR, Amish SJ, Pritchard VL, McKelvey KS, Young MK, Schwartz MK, Garza JC,  
736 Luikart G, Narum SR (2012) Development and evaluation of 200 novel SNP assays for

- 737 population genetic studies of westslope cutthroat trout and genetic identification of related  
738 taxa. *Molecular Ecology Resources*, **12**, 942–949.
- 739 Colton RB, Lemke RW, Lindvall RM (1961) Glacial map of Montana east of the Rocky  
740 Mountains. U.S. Geological Survey Miscellaneous Investigations Series Map I-327, scale 1 :  
741 500,000, 1 sheet.
- 742 Comte L, Grenouillet G (2013) Do stream fish track climate change? Assessing distribution  
743 shifts in recent decades. *Ecography*, **36**, 1236–1246.
- 744 Crawford B (1979) Origin and history of the trout brood stocks of the Washington Department of  
745 Game. Available online: <https://www.watrailblazers.org/science/crawford/>. Accessed 8 May  
746 2017.
- 747 Crisp MD, Trewick SA, Cook LG (2011) Hypothesis testing in biogeography. *Trends in Ecology  
748 & Evolution*, **26**, 66–72.
- 749 Davis NK, Locke WW, Pierce KL, Finkel RC (2006) Glacial Lake Musselshell: Late Wisconsin  
750 slackwater on the Laurentide ice margin in central Montana, USA. *Geomorphology*, **75**, 330–  
751 345.
- 752 Drinan DP (2010) Thermal adaptation of westslope cutthroat trout *Oncorhynchus clarkii lewisi*.  
753 Master's thesis, Montana State University, Bozeman.
- 754 Drinan DP, Kalinowski ST, Vu NV, Shepard BB, Muhlfeld CC, Campbell MR (2011) Genetic  
755 variation in westslope cutthroat trout *Oncorhynchus clarkii lewisi*: implications for  
756 conservation. *Conservation Genetics*, **12**, 1513–1523.
- 757 Earl DA, vonHoldt BM (2012) STRUCTURE HARVESTER: a website and program for  
758 visualizing STRUCTURE output and implementing the Evanno method. *Conservation  
759 Genetics Resources*, **4**, 359–361.
- 760 Eby LA, Helmy O, Holsinger LM, Young MK (2014) Evidence of climate-induced range  
761 contractions for bull trout in a Rocky Mountain watershed, U.S.A. *PLoS One*, **9**, e98812.
- 762 Evanno G, Regnaut S, Goudet J (2005) Detecting the number of clusters of individuals using the  
763 software STRUCTURE: a simulation study. *Molecular Ecology*, **14**, 2611–2620.
- 764 Falush D, Stephens M, Pritchard JK (2003) Inference of population structure using multilocus  
765 genotype data: linked loci and correlated allele frequencies. *Genetics*, **164**, 1567–1587.

- 766 Fecht KR, Reidel SP, Tallman AM (1985) Paleodrainage of the Columbia River system on the  
767 Columbia Plateau of Washington state: A summary. Rockwell International Corp., Richland,  
768 Washington. RHO-BW-SA-318-P.
- 769 Fisheries and Oceans Canada (2014) Recovery Strategy for the Alberta populations of Westslope  
770 Cutthroat Trout (*Oncorhynchus clarkii lewisi*) in Canada [Final]. Species at Risk Act  
771 Recovery Strategy Series. Fisheries and Oceans Canada, Ottawa.
- 772 Fraser DJ, Bernatchez L (2001) Adaptive evolutionary conservation: towards a unified concept  
773 for defining conservation units. *Molecular Ecology*, **10**, 2741–2752.
- 774 Girard CF (1856) Notice upon the species of the genus *Salmo*, of authors, observed chiefly in  
775 Oregon and California. *Proceedings of the Academy of Natural Sciences of Philadelphia*, **8**,  
776 217–220.
- 777 Gunckel S (2002) Stocking history of westslope cutthroat trout and rainbow trout in the upper  
778 John Day Basin, Oregon. Oregon Department of Fish and Wildlife, Corvallis.
- 779 Hampe A, Petit RJ (2005) Conserving biodiversity under climate change: the rear edge matters.  
780 *Ecology Letters*, **8**, 461–467.
- 781 Hanson MA, Clague JJ (2016) Record of glacial Lake Missoula floods in glacial Lake Columbia,  
782 Washington. *Quaternary Science Reviews*, **133**, 62–76.
- 783 Harwood AS, Phillips RB (2011) A suite of twelve single nucleotide polymorphism markers for  
784 detecting introgression between cutthroat and rainbow trout. *Molecular Ecology Resources*,  
785 **11**, 382–385.
- 786 Heath TA, Hedtke SM, Hillis DM (2008) Taxon sampling and the accuracy of phylogenetic  
787 analyses. *Journal of Systematics and Evolution*, **46**, 239–257.
- 788 Herring EM, Gavin DG (2015) Climate and vegetation since the Last Interglacial (MIS 5e) in a  
789 putative glacial refugium, northern Idaho, USA. *Quaternary Science Reviews*, **117**, 82–95.
- 790 Houston DD, Elzinga DB, Maughan PJ, Smith SM, Kauwe JS, Evans RP, Stinger RB, Shiozawa  
791 DK (2012) Single nucleotide polymorphism discovery in cutthroat trout subspecies using  
792 genome reduction, barcoding, and 454 pyro-sequencing. *BMC Genomics*, **13**, 724.
- 793 Howard AD (1958) Drainage evolution in northeastern Montana and northwestern North Dakota.  
794 *Geological Society of America Bulletin*, **69**, 575–588.
- 795 Hubisz MJ, Falush D, Stephens M, Pritchard JK (2009) Inferring weak population structure with  
796 the assistance of sample group information. *Molecular Ecology Resources*, **9**, 1322–1332.

- 797 Hughes PD, Gibbard PL, Ehlers J (2013) Timing of glaciation during the last glacial cycle:  
798 evaluating the concept of a global ‘Last Glacial Maximum’ (LGM). *Earth-Science Reviews*,  
799 **125**, 171–198.
- 800 Iwasaki W, Fukunaga T, Isagozawa R, Yamada K, Maeda Y, Satoh TP, Sado T, Mabuchi K,  
801 Takeshima H, Miya M, Nishida M (2013) MitoFish and MitoAnnotator: a mitochondrial  
802 genome database of fish with an accurate and automatic annotation pipeline. *Molecular*  
803 *Biology and Evolution*, **30**, 2531–2540.
- 804 Jarrett RD, Malde HE (1987) Paleodischarge of the late Pleistocene Bonneville Flood, Snake  
805 River, Idaho, computed from new evidence. *Geological Society of America Bulletin*, **99**, 127–  
806 134.
- 807 Kalinowski ST, Novak BJ, Drinan DP, Jennings R, Vu NV (2011) Diagnostic single nucleotide  
808 polymorphisms for identifying westslope cutthroat trout (*Oncorhynchus clarki* [sic] *lewisii*),  
809 Yellowstone cutthroat trout (*Oncorhynchus clarkii bowvieri*) and rainbow trout  
810 (*Oncorhynchus mykiss*). *Molecular Ecology Resources*, **11**, 389–393.
- 811 Katoh K, Standley DM (2013) MAFFT multiple sequence alignment software version 7:  
812 improvements in performance and usability. *Molecular Biology and Evolution*, **30**, 772–780.
- 813 Keeley ER, Parkinson EA, Taylor EB (2007) The origins of ecotypic variation of rainbow trout:  
814 a test of environmental vs. genetically based differences in morphology. *Journal of*  
815 *Evolutionary*, **20**, 725–736.
- 816 Kumar S, Stecher G, Tamura K (2016) MEGA7: Molecular Evolutionary Genetics Analysis  
817 version 7.0 for bigger datasets. *Molecular Biology and Evolution*, **33**, 1870–1874.
- 818 Lachance J, Tishkoff SA (2013) SNP ascertainment bias in population genetic analyses: why it is  
819 important, and how to correct it. *Bioessays*, **35**, 780–786.
- 820 Lanfear R, Frandsen PB, Wright AM, Senfeld T, Calcott B (2016) PartitionFinder 2: new  
821 methods for selecting partitioned models of evolution for molecular and morphological  
822 phylogenetic analyses. *Molecular Biology and Evolution*, **34**, 772–773.
- 823 Langer WH, Van Gosen BS, Meeker GP, Adams DT, Hoefen TM (2011) The dispersion of  
824 fibrous amphiboles by glacial processes in the area surrounding Libby, Montana, USA.  
825 *Environmental Earth Sciences*, **64**, 157–168.

- 826 Leary RF, Allendorf FW, Phelps SR, Knudsen KL (1987) Genetic divergence and identification  
827 of seven cutthroat trout subspecies and rainbow trout. *Transactions of the American Fisheries*  
828 *Society*, **116**, 580–587.
- 829 Leary RF, Allendorf FW, Phelps SR, Knudsen KL (1988) Population genetic structure of  
830 westslope cutthroat trout: genetic variation within and among populations. *Proceedings of the*  
831 *Montana Academy of Sciences*, **48**, 57–70.
- 832 LeMoine M, Young MK, McKelvey KS, Eby L, Pilgrim KL, Schwartz MK (2014) *Cottus*  
833 *schitsuumsh*, a new species of sculpin (Scorpaeniformes: Cottidae) in the Columbia River  
834 basin, Idaho-Montana, USA. *Zootaxa*, **3755**, 241–258.
- 835 Leopold A (1953) Round river. Oxford University Press, New York.
- 836 Loudenslager EJ, Gall GA (1980) Geographic patterns of protein variation and subspeciation in  
837 cutthroat trout, *Salmo clarki*. *Systematic Biology*, **29**, 27–42.
- 838 Loxterman JL, Keeley ER (2012) Watershed boundaries and geographic isolation: patterns of  
839 diversification in cutthroat trout from western North America. *BMC Evolutionary Biology*, **12**,  
840 38.
- 841 Malde HE (1968) The catastrophic late Pleistocene Bonneville Flood in the Snake River Plain,  
842 Idaho. U.S. Geological Survey Professional Paper 596.
- 843 Marnell LF (1988) Status of westslope cutthroat trout in Glacier National Park, Montana.  
844 *American Fisheries Society Symposium*, **4**, 61–70.
- 845 McDonald EV, Sweeney MR, Busacca AJ (2012) Glacial outburst floods and loess  
846 sedimentation documented during Oxygen Isotope Stage 4 on the Columbia Plateau,  
847 Washington State. *Quaternary Science Reviews*, **29**, 18–30.
- 848 McKelvey KS, Young MK, Wilcox TM, Bingham DM, Pilgrim KL, Schwartz MK (2016)  
849 Patterns of hybridization among cutthroat trout and rainbow trout in northern Rocky  
850 Mountain streams. *Ecology and Evolution*, **6**, 688–706.
- 851 McPhail JD (2007) The freshwater fishes of British Columbia. The University of Alberta Press,  
852 Edmonton.
- 853 McPhail JD, Lindsey CC (1986) Zoogeography of the freshwater fishes of Cascadia (the  
854 Columbia system and rivers north to the Stikine). Pages 615–637 in Hocutt CH, Wiley EO  
855 (editors) The zoogeography of North American freshwater fishes. John Wiley & Sons, New  
856 York.

- 857 Mee JA, Bernatchez L, Reist JD, Rogers SM, Taylor EB (2015) Identifying designatable units  
858 for intraspecific conservation prioritization: a hierarchical approach applied to the lake  
859 whitefish species complex (*Coregonus* spp.). *Evolutionary Applications*, **8**, 423–441.
- 860 Metcalf JL, Love Stowell S, Kennedy CM, Rogers KB, McDonald D, Epp J, Keepers K, Cooper  
861 A, Austin JJ, Martin AP (2012) Historical stocking data and 19<sup>th</sup> century DNA reveal human-  
862 induced changes to native diversity and distribution of cutthroat trout. *Molecular Ecology*, **21**,  
863 5194–5207.
- 864 Minckley WL, Hendrickson DA, Bond CE (1986) Geography of western North American  
865 freshwater fishes: description and relationships to intracontinental tectonism. Pages 519–613  
866 in Hocutt CH, Wiley EO (editors) *The zoogeography of North American freshwater fishes*.  
867 John Wiley & Sons, New York.
- 868 Moritz C, Lavery S, Slade R (1995) Using allele frequency and phylogeny to define units for  
869 conservation and management. Pages 249–262 in (Nielsen JL, Powers GA, editors) *Evolution*  
870 *and the aquatic ecosystem: defining unique units in population conservation*. Symposium 17.  
871 American Fisheries Society, Bethesda, Maryland.
- 872 Neville HM, Dunham JB (2011) Patterns of hybridization of nonnative cutthroat trout and  
873 hatchery rainbow trout with native redband trout in the Boise River, Idaho. *North American*  
874 *Journal of Fisheries Management*, **31**, 1163–1176.
- 875 O'Connor JE (1993) Hydrology, hydraulics, and geomorphology of the Bonneville flood.  
876 *Geological Society of America Special Papers*, **274**, 1–84.
- 877 Oviatt CG (2015) Chronology of Lake Bonneville, 30,000 to 10,000 yr BP. *Quaternary Science*  
878 *Reviews*, **110**, 166–171.
- 879 Peters JL (2012) Late Pleistocene evolution of glacial Lake Purcell: a potential floodwater source  
880 to the Channeled Scabland. Master's thesis, Simon Fraser University, Burnaby, BC.
- 881 Pierce K (2003) Pleistocene glaciations of the Rocky Mountains. Pages 63–76 in Gillespie AR,  
882 Porter SC, Atwater BF (editors). *The Quaternary Period in the United States: Developments*  
883 *in Quaternary Science*, 1. Elsevier, Amsterdam.
- 884 Pritchard VL, Abadía-Cardoso A, Garza JC (2012) Discovery and characterization of a large  
885 number of diagnostic markers to discriminate *Oncorhynchus mykiss* and *O. clarkii*. *Molecular*  
886 *Ecology Resources*, **12**, 918–931.

- 887 Pritchard VL, Garza JC, Peacock MM (2015) SNPs reveal previously undocumented non-native  
888 introgression within threatened trout populations. *Conservation Genetics*, **16**, 1001–1006.
- 889 Pritchard VL, Metcalf JL, Jones K, Martin AP, Cowley DE (2009) Population structure and  
890 genetic management of Rio Grande cutthroat trout (*Oncorhynchus clarkii virginalis*).  
891 *Conservation Genetics*, **10**, 1209.
- 892 Ratnasingham S, Hebert PD (2013) A DNA-based registry for all animal species: the Barcode  
893 Index Number (BIN) system. *PloS One*, **8**, e66213.
- 894 Richardson J (1836) The Fish. In: Fauna Boreali-Americana; or the zoology of the northern parts  
895 of British America: containing descriptions of the objects of natural history collected on the  
896 late northern land expeditions, under the command of Sir John Franklin, R.N. J. Bentley,  
897 London. Part 3: i-xv + 1-327, Pls. 74-97.
- 898 Ryman N (1983) Patterns of distribution of biochemical genetic variation in salmonids:  
899 differences between species. *Aquaculture*, **33**, 1–21.
- 900 Satoh TP, Miya M, Mabuchi K, Nishida M (2016) Structure and variation of the mitochondrial  
901 genome of fishes. *BMC Genomics*, **17**, 719.
- 902 Schultz LP (1941) Fishes of Glacier National Park Montana. U.S. National Park Service.  
903 Conservation Bulletin 22.
- 904 Seiler MB, Keeley ER (2009) Intraspecific taxonomy and ecology characterize morphological  
905 divergence among cutthroat trout (*Oncorhynchus clarkii* ssp. Richardson) populations.  
906 *Biological Journal of the Linnean Society*, **96**, 266–281.
- 907 Shafer A, Cullingham CI, Cote SD, Coltman DW (2010) Of glaciers and refugia: a decade of  
908 study sheds new light on the phylogeography of northwestern North America. *Molecular  
909 Ecology*, **19**, 4589–4621.
- 910 Shepard BB, May BE, Urie W (2005) Status and conservation of westslope cutthroat trout within  
911 the western United States. *North American Journal of Fisheries Management*, **25**, 1426–1440.
- 912 Silvestro D, Michalak I (2012) raxmlGUI: a graphical front-end for RAxML. *Organisms  
913 Diversity & Evolution*, **12**, 335–337.
- 914 Simon RC, Dollar AM (1963) Cytological aspects of speciation in two North American teleosts,  
915 *Salmo gairdneri* and *Salmo clarki lewisi*. *Canadian Journal of Genetics and Cytology*, **5**, 43–  
916 49.

- 917 Stamatakis A (2014) RAxML version 8: a tool for phylogenetic analysis and post-analysis of  
918 large phylogenies. *Bioinformatics*, **30**, 1312–1313.
- 919 Stearley RF, Smith GR (2016) Fishes of the Mio-Pliocene western Snake River Plain and  
920 vicinity. I. Salmonid fishes from Mio-Pliocene lake sediments in the western Snake River  
921 Plain and the Great Basin. Miscellaneous Publications of the Museum of Zoology, University  
922 of Michigan, 204.
- 923 Taylor EB, Stamford MD, Baxter JS (2003) Population subdivision in westslope cutthroat trout  
924 (*Oncorhynchus clarki lewisi*) at the northern periphery of its range: evolutionary inferences  
925 and conservation implications. *Molecular Ecology*, **12**, 2609–2622.
- 926 Taylor HR, Harris WE (2012) An emergent science on the brink of irrelevance: a review of the  
927 past 8 years of DNA barcoding. *Molecular Ecology Resources*, **12**, 377–388.
- 928 Thorgaard GH (1983) Chromosomal differences among rainbow trout populations. *Copeia*,  
929 **1983**, 650–662.
- 930 Thorgaard GH, Bestgen KR, Trotter PC, Loudenslager EJ, Wheeler PA (this volume). Historical  
931 studies on cutthroat trout taxonomy based on morphological-meristic characters, allozymes  
932 and chromosomes. Chapter 5. Evolutionary biology and taxonomy of cutthroat trout.  
933 American Fisheries Society, Bethesda, Maryland.
- 934 Trotter PC, McMillan B, Gayeski N, Spruell P, Berkley R (1999) Genetic and phenotypic catalog  
935 of native resident trout of the interior Columbia River Basin. Populations of the upper Yakima  
936 basin. Report DOE/BP-07901-1.
- 937 Trotter PC, McMillan B, Gayeski N, Spruell P, Cook MK (2001a) Genetic and phenotypic  
938 catalog of native resident trout of the interior Columbia River Basin. Populations in the  
939 Wenatchee, Entiat, Lake Chelan, and Methow River drainages. Report DOE/BP-00004575-2.
- 940 Trotter PC, McMillan B, Gayeski N, Spruell P, Whiteley (2001b) Genetic and phenotypic  
941 catalog of native resident trout of the interior Columbia River Basin. Populations of the Pend  
942 Oreille, Kettle, and Sanpoil River basins of Colville National Forest. Report DOE/BP-  
943 00004575-1.
- 944 U.S. Fish and Wildlife Service (2003) Reconsidered finding for an amended petition to list the  
945 westslope cutthroat trout as threatened throughout its range. *Federal Register*, **68**, 46989–  
946 47009.



- 947 Vu NV, Kalinowski ST (2009) Twelve tetranucleotide microsatellite loci for westslope cutthroat  
948 trout *Oncorhynchus clarki lewisi* (Salmonidae). *Conservation Genetics Resources*, **1**, 249.
- 949 Waitt RB (1985) Case for periodic, colossal jökulhlaups from Pleistocene glacial Lake Missoula.  
950 *Geological Society of America Bulletin*, **96**, 1271–1286.
- 951 Waitt RB, Denlinger RP, O'Connor JE (2009). Many monstrous Missoula floods down  
952 channeled scabland and Columbia valley. *Geological Society of America Field Guide*, **15**,  
953 775–844.
- 954 Waples RS (1991) Pacific salmon, *Oncorhynchus* spp., and the definition of "species" under the  
955 Endangered Species Act. *Marine Fisheries Review*, **53**, 11–22.
- 956 Waples RS, Gustafson RG, Weitkamp LA, Myers JM, Jjohnson OW, Busby PJ, Hard JJ, Bryant  
957 GJ, Waknitz FW, Nelly K, Teel D (2001) Characterizing diversity in salmon from the Pacific  
958 Northwest. *Journal of Fish Biology*, **59(sA)**, 1–41.
- 959 Ward RD (2009) DNA barcode divergence among species and genera of birds and fishes.  
960 *Molecular Ecology Resources*, **9**, 1077–1085.
- 961 Wenburg JK, Bentzen P (2001) Genetic and behavioral evidence for restricted gene flow among  
962 coastal cutthroat trout populations. *Transactions of the American Fisheries Society*, **130**,  
963 1049–1069.
- 964 Whiteley AR, Spruell P, Allendorf FW (2006) Can common species provide valuable  
965 information for conservation? *Molecular Ecology*, **15**, 2767–2786.
- 966 Williams JE, Williams RN, Thurow RF, Elwell L, Philipp DP, Harris FA, Kershner JL, Martinez  
967 PJ, Miller D, Reeves GH, Frissell CA (2011) Native fish conservation areas: a vision for  
968 large-scale conservation of native fish communities. *Fisheries*, **36**, 267–277.
- 969 Wilson WD, Turner TF (2009) Phylogenetic analysis of the Pacific Cutthroat Trout  
970 (*Oncorhynchus clarki* ssp.: Salmonidae) based on partial mtDNA ND4 sequences: A closer  
971 look at the highly fragmented inland species. *Molecular Phylogenetics and Evolution*, **52**,  
972 406–415.
- 973 Wiltzius WJ (1985) Fish culture and stocking in Colorado, 1872-1978. Division report 12.  
974 Colorado Division of Wildlife, Denver.
- 975 Wood SH, Clemens DM (2002) Geologic and tectonic history of the western Snake River Plain,  
976 Idaho and Oregon. *Idaho Geological Survey Bulletin*, **30**, 69–103.

- 977 Xia X (2017) DAMBE6: new tools for microbial genomics, phylogenetics, and molecular  
978 evolution. *The Journal of Heredity*, esx033. doi: 10.1093/jhered/esx033.
- 979 Yau MM, Taylor EB (2013) Environmental and anthropogenic correlates of hybridization  
980 between westslope cutthroat trout (*Oncorhynchus clarkii lewisi*) and introduced rainbow trout  
981 (*O. mykiss*). *Conservation Genetics*, **14**, 885–900.
- 982 Young MK (1995) Conservation assessment for inland cutthroat trout. U.S. Forest Service  
983 General Technical Report RM-256.
- 984 Young MK, Harig AL (2001) A critique of the recovery of greenback cutthroat trout.  
985 *Conservation Biology*, **15**, 1575–1584.
- 986 Young MK, McKelvey KS, Pilgrim KL, Schwartz MK (2013) DNA barcoding at riverscape  
987 scales: assessing biodiversity among fishes of the genus *Cottus* (Teleostei) in northern Rocky  
988 Mountain streams. *Molecular Ecology Resources*, **13**, 583–595.
- 989 Young SF, McLellan JG, Shaklee JB (2004) Genetic integrity and microgeographic population  
990 structure of westslope cutthroat trout, *Oncorhynchus clarki lewisi*, in the Pend Oreille Basin in  
991 Washington. *Environmental Biology of Fishes*, **69**, 127–142.
- 992

993 Table 1. Samples used in the phylogeographic analysis of westslope cutthroat trout. Site labels are in Figure 1.

994

---

| Site      | 4th-code HU <sup>1</sup> | State/<br>Province | Latitude | Longitude | <i>N</i> <sup>2</sup> | MG <sup>3</sup> | ND2 <sup>4</sup> | SNP <sup>5</sup> | Label |
|-----------|--------------------------|--------------------|----------|-----------|-----------------------|-----------------|------------------|------------------|-------|
| Albert    | Middle Clark Fork        | MT                 | 46.9213  | -114.3678 | 1                     | 1               | A                |                  | 1     |
| Beaver    | Yaak                     | MT                 | 48.8174  | -115.6787 | 1                     | 2               | A                |                  | 2     |
| Bostwick  | Gallatin                 | MT                 | 45.7995  | -110.9981 | 10                    | 3               | A                | x                | 3     |
| Moose     | Blackfoot                | MT                 | 46.9227  | -112.8534 | 6                     | 4               | A                | x                | 4     |
| Deer      | Bitterroot               | MT                 | 45.5746  | -114.4784 | 13                    | 5               | A                | x                | 5     |
| EF Bull   | Lower Clark Fork         | MT                 | 48.1151  | -115.6868 | 11                    | 6               | B                | x                | 6     |
| Ketchikan | North Fork Flathead      | MT                 | 48.9771  | -114.5071 | 1                     | 7               | A                |                  | 7     |
| McGuire   | Upper Kootenai           | MT                 | 48.6896  | -115.2728 | 10                    | 8               | A                | x                | 8     |
| Martin    | Bitterroot               | MT                 | 46.0057  | -113.8161 | 1                     | 9               | A                |                  | 9     |
| McCabe    | Blackfoot                | MT                 | 47.1324  | -113.0840 | 6                     | 10              | A                | x                | 10    |
| Miller    | Fisher                   | MT                 | 48.0827  | -115.4642 | 5                     | 11              | A                | x                | 11    |
| Meadow    | Lower Selway             | ID                 | 45.7154  | -115.1953 | 12                    | 12              | C                | x                | 12    |
| Norton    | Upper Clark Fork         | MT                 | 45.9811  | -112.8041 | 8                     | 13              | A                | x                | 13    |
| Ontario   | Upper Clark Fork         | MT                 | 46.4454  | -112.3940 | 8                     | 14              | A                | x                | 14    |
| North     | Bitterroot               | MT                 | 46.7343  | -114.6085 | 1                     | 15              | A                |                  | 15    |
| Tyler     | Flint-Rock               | MT                 | 46.6377  | -113.5047 | 1                     | 16              | A                |                  | 16    |
| Wilkes    | Lower Clark Fork         | MT                 | 47.4962  | -115.4883 | 1                     | 17              | A                |                  | 17    |
| Canuck    | Moyie                    | MT                 | 48.9988  | -116.0618 | 8                     | 18              | A                | x                | 18    |
| Ball      | Lower Kootenai           | ID                 | 48.7712  | -116.6069 | 10                    | 19              | A                | x                | 19    |
| Rampike   | Upper Coeur d'Alene      | ID                 | 47.8197  | -115.9619 | 10                    | 20              | D                | x                | 20    |
| Trail     | Upper Coeur d'Alene      | ID                 | 47.8291  | -116.3941 | 10                    | 21              | D                | x                | 21    |
| West Gold | Pend Oreille Lake        | ID                 | 47.9259  | -116.5078 | 10                    | 22              | A                | x                | 22    |
| Avalanche | Upper Missouri           | MT                 | 46.7439  | -111.5180 | 7                     | 23              | A                | x                | 23    |
| Beaver    | Priest                   | ID                 | 48.7489  | -116.9270 | 10                    | 24              | A                | x                | 24    |
| Mokins    | Upper Spokane            | ID                 | 47.7826  | -116.6663 | 1                     | 25              | A                |                  | 25    |

| Site                   | 4th-code HU <sup>1</sup>    | State/<br>Province | Latitude | Longitude | <i>N</i> <sup>2</sup> | MG <sup>3</sup> | ND2 <sup>4</sup> | SNP <sup>5</sup> | Label |
|------------------------|-----------------------------|--------------------|----------|-----------|-----------------------|-----------------|------------------|------------------|-------|
| NF St. Joe             | St. Joe                     | ID                 | 47.4055  | -115.8382 | 1                     | 26              | B                |                  | 26    |
| Skin                   | Moyie                       | MT                 | 48.7728  | -116.1446 | 1                     | 27              | A                |                  | 27    |
| Slowey                 | Middle Clark Fork           | MT                 | 47.2808  | -114.9731 | 1                     | 28              | A                |                  | 28    |
| Dry Wolf               | Judith                      | MT                 | 46.9492  | -110.5684 | 1                     | 29              | A                |                  | 29    |
| Fish                   | Jefferson                   | MT                 | 45.8032  | -112.4725 | 1                     | <b>30</b>       | A                |                  | 30    |
| Heller                 | St. Joe                     | ID                 | 47.0662  | -115.2167 | 1                     | 31              | E                |                  | 31    |
| Tributary of Armstrong | Coeur d'Alene Lake          | ID                 | 47.5543  | -116.5993 | 1                     | 32              | A                |                  | 32    |
| NF Dupuyer             | Two Medicine                | MT                 | 48.0636  | -112.8182 | 1                     | 33              | A                |                  | 33    |
| Sawmill                | Belt                        | MT                 | 47.1013  | -110.7097 | 1                     | <b>30</b>       | A                |                  | 34    |
| Youngs                 | South Fork Flathead         | MT                 | 47.2838  | -113.3568 | 1                     | 35              | A                |                  | 35    |
| French                 | Upper North Fork Clearwater | ID                 | 46.5143  | -115.6768 | 1                     | <b>36</b>       | C                |                  | 36    |
| Osier                  | Upper North Fork Clearwater | ID                 | 46.8055  | -115.0836 | 1                     | 37              | F                |                  | 37    |
| Crooked Fork           | Lochsa                      | ID                 | 46.6843  | -114.6958 | 1                     | 38              | C                |                  | 38    |
| Pete King              | Lochsa                      | ID                 | 46.1929  | -115.7064 | 1                     | 39              | C                |                  | 39    |
| Baldy                  | South Fork Clearwater       | ID                 | 45.9415  | -115.6750 | 1                     | 40              | C                |                  | 40    |
| Bad Luck               | Upper Selway                | ID                 | 45.8956  | -114.7553 | 1                     | 41              | B                |                  | 41    |
| Flat                   | Upper Selway                | ID                 | 45.7213  | -114.8575 | 1                     | 42              | C                |                  | 42    |
| Twisp                  | Methow                      | WA                 | 48.3839  | -120.4342 | 5                     | 43              | G                | x                | 43    |
| Buck                   | Wenatchee                   | WA                 | 47.9163  | -120.7132 | 1                     | <b>36</b>       | C                |                  | 44    |
| Cedar                  | Pend Oreille                | ID                 | 48.8333  | -117.4952 | 9                     | <b>45</b>       | A                | x                | 45    |
| Ninemile               | Sanpoil                     | WA                 | 48.3596  | -118.7420 | 1                     | 46              | A                |                  | 46    |
| Mill                   | Upper Salmon                | ID                 | 44.4940  | -114.4200 | 10                    | <b>47</b>       | F                | x                | 47    |
| Morse                  | Pashimeroi                  | ID                 | 44.6222  | -113.7999 | 9                     | <b>47</b>       | F                | x                | 48    |
| Jacobs Ladder          | Lower Middle Fork Salmon    | ID                 | 45.0766  | -115.3373 | 10                    | 49              | F                | x                | 49    |
| MF Little Timber       | Lemhi                       | ID                 | 44.5867  | -113.4618 | 1                     | 50              | F                |                  | 50    |
| American               | South Fork Clearwater       | ID                 | 45.7452  | -115.9635 | 1                     | 51              | C                |                  | 51    |
| Scotchman              | Flint-Rock                  | MT                 | 46.3818  | -113.5519 | 1                     | 52              | H                |                  | 52    |

| Site         | 4th-code HU <sup>1</sup>    | State/<br>Province | Latitude | Longitude | <i>N</i> <sup>2</sup> | MG <sup>3</sup> | ND2 <sup>4</sup> | SNP <sup>5</sup> | Label |
|--------------|-----------------------------|--------------------|----------|-----------|-----------------------|-----------------|------------------|------------------|-------|
| Fourmile     | Smith                       | MT                 | 46.5447  | -110.7372 | 8                     | 53              | A                | x                | 53    |
| Kraft        | Swan                        | MT                 | 47.4142  | -113.7778 | 10                    | <b>4</b>        | A                | x                | 54    |
| Leiberg      | Upper Coeur d'Alene         | ID                 | 47.7209  | -116.3834 | 10                    | 55              | I                | x                | 55    |
| NF Grouse    | Pend Oreille Lake           | ID                 | 48.4962  | -116.3481 | 1                     | 56              | J                |                  | 56    |
| NF Teton     | Teton                       | MT                 | 47.9905  | -112.8143 | 1                     | <b>23</b>       | A                |                  | 57    |
| SF Red       | South Fork Clearwater       | ID                 | 45.6282  | -115.4310 | 10                    | 58              | A                | x                | 58    |
| Yoosa        | Clearwater                  | ID                 | 46.4100  | -115.5864 | 7                     | <b>45</b>       | A                | x                | 59    |
| Falls        | Lake Chelan                 | WA                 | 48.0810  | -120.3577 | 6                     | 60              | C                | x                | 60    |
| Thayer       | Big Hole                    | MT                 | 45.2054  | -113.2944 | 1                     | <b>61</b>       | A                |                  | 61    |
| Hungery      | Lochsa                      | ID                 | 46.3758  | -115.5400 | 1                     | 62              | C                |                  | 62    |
| Ross         | Upper Kootenai              | MT                 | 48.1853  | -115.9790 | 1                     | 63              | K                |                  | 63    |
| Ditch        | South Fork Clearwater       | ID                 | 45.7712  | -115.3051 | 10                    | 64              | L                | x                | 64    |
| EF Emerald   | St. Joe                     | ID                 | 46.9871  | -116.4163 | 1                     | 65              | B                |                  | 65    |
| Big          | Pashimeroi                  | ID                 | 44.4416  | -113.5987 | 1                     | 66              | F                |                  | 66    |
| Bitter       | Kettle HW                   | BC                 | 49.0153  | -118.1243 | 1                     | 67              | B                |                  | 67    |
| Blackbird    | Middle Salmon-Panther       | ID                 | 45.0675  | -114.3487 | 1                     | 68              | F                |                  | 68    |
| Blairmore    | Oldman                      | AB                 | 49.7143  | -114.4630 | 1                     | 69              | M                |                  | 69    |
| Bluff        | St. Joe                     | ID                 | 47.1668  | -115.5088 | 1                     | 70              | E                |                  | 70    |
| Boundary     | Upper Middle Fork Salmon    | ID                 | 44.5276  | -115.3004 | 1                     | 71              | F                |                  | 71    |
| Buffalo      | Beaverhead                  | MT                 | 45.1646  | -113.2000 | 1                     | <b>61</b>       | A                |                  | 72    |
| Cayuse       | Upper North Fork Clearwater | ID                 | 46.5998  | -114.8931 | 1                     | 73              | C                |                  | 73    |
| Colson       | Middle Salmon-Panther       | ID                 | 45.3247  | -114.5365 | 1                     | 74              | N                |                  | 74    |
| Crazy        | Fraser HW                   | BC                 | 51.0228  | -118.6053 | 1                     | 75              | A                |                  | 75    |
| Duck         | Lower Middle Fork Salmon    | ID                 | 44.8522  | -114.5220 | 1                     | 76              | F                |                  | 76    |
| Floodwood    | Lower North Fork Clearwater | ID                 | 47.0241  | -115.9553 | 1                     | 77              | F                |                  | 77    |
| Hartley      | Kootenai HW                 | BC                 | 49.5761  | -115.0255 | 1                     | 78              | A                |                  | 78    |
| Indian Grave | Lochsa                      | ID                 | 46.4787  | -115.0899 | 1                     | 79              | C                |                  | 79    |

| Site           | 4th-code HU <sup>1</sup>    | State/<br>Province | Latitude | Longitude | $N^2$ | MG <sup>3</sup> | ND2 <sup>4</sup> | SNP <sup>5</sup> | Label |
|----------------|-----------------------------|--------------------|----------|-----------|-------|-----------------|------------------|------------------|-------|
| John Day       | Upper John Day              | OR                 | 44.2978  | -118.5501 | 1     | 80              | O                |                  | 80    |
| Meadow         | South Fork Salmon           | ID                 | 44.8950  | -115.3404 | 1     | 81              | P                |                  | 81    |
| Monk           | Priest HW                   | BC                 | 49.0329  | -116.9780 | 1     | 82              | A                |                  | 82    |
| NF Elkhorn     | Upper Middle Fork Salmon    | ID                 | 44.6405  | -115.3324 | 1     | 83              | Q                |                  | 83    |
| Pack           | Pend Oreille Lake           | ID                 | 48.6592  | -116.6244 | 1     | 84              | B                |                  | 84    |
| Sheep          | Middle Fork Flathead        | MT                 | 48.2321  | -113.6183 | 1     | 85              | A                |                  | 85    |
| Split          | South Fork Salmon           | ID                 | 45.0809  | -115.7844 | 1     | 86              | F                |                  | 86    |
| Toby           | Columbia HW                 | BC                 | 50.3598  | -116.5000 | 1     | 87              | A                |                  | 87    |
| Truman         | Flathead Lake               | MT                 | 47.9938  | -114.4016 | 1     | 88              | R                |                  | 88    |
| Twin           | Upper Salmon                | ID                 | 44.5792  | -114.4275 | 1     | 89              | B                |                  | 89    |
| Waiparous      | Bow                         | AB                 | 51.3864  | -115.1686 | 1     | 90              | A                |                  | 90    |
| Warm Springs   | Upper Salmon                | ID                 | 44.1029  | -114.7472 | 1     | 91              | F                |                  | 91    |
| Werner         | North Fork Flathead         | MT                 | 48.5931  | -114.3679 | 1     | 92              | S                |                  | 92    |
| Withington     | Lenhi                       | ID                 | 45.0422  | -113.7966 | 1     | 93              | F                |                  | 93    |
| Wounded Buck   | South Fork Flathead         | MT                 | 48.2280  | -113.9705 | 1     | 94              | A                |                  | 94    |
| Gravey         | Upper North Fork Clearwater | ID                 | 46.5284  | -115.1336 | 1     | 95              | C                |                  | 95    |
| Twentyfivemile | Middle Fork Flathead        | MT                 | 48.2055  | -113.3799 | 1     | 96              | A                |                  | 96    |
| WF Bitterroot  | Bitterroot                  | MT                 | 45.5040  | -114.3334 | 1     |                 | Z                |                  | 97    |
| Beaver         | Blackfoot                   | MT                 | 47.0190  | -112.7674 | 1     |                 | Z                |                  | 98    |
| Chimney        | Blackfoot                   | MT                 | 46.7626  | -113.0219 | 1     |                 | Z                |                  | 99    |
| Canyon         | Bow                         | AB                 | 50.8953  | -114.7774 | 1     |                 | Z                |                  | 100   |
| Picklejar 2    | Bow                         | AB                 | 50.5198  | -114.7737 | 1     |                 | Z                |                  | 101   |
| Picklejar 4    | Bow                         | AB                 | 50.5188  | -114.7841 | 1     |                 | Z                |                  | 102   |
| Prairie        | Bow                         | AB                 | 50.8783  | -114.8885 | 1     |                 | W                |                  | 103   |
| Quirk          | Bow                         | AB                 | 50.8068  | -114.7533 | 1     |                 | W                |                  | 104   |
| Running Rain   | Bow                         | AB                 | 50.5045  | -114.9452 | 1     |                 | Z                |                  | 105   |
| Silvester      | Bow                         | AB                 | 50.8614  | -114.7257 | 1     |                 | Z                |                  | 106   |

| Site                | 4th-code HU <sup>1</sup>    | State/<br>Province | Latitude | Longitude | N <sup>2</sup> | MG <sup>3</sup> | ND2 <sup>4</sup> | SNP <sup>5</sup> | Label |
|---------------------|-----------------------------|--------------------|----------|-----------|----------------|-----------------|------------------|------------------|-------|
| Akolkolex           | Columbia HW                 | BC                 | 50.9151  | -117.8787 | 1              |                 | Z                |                  | 107   |
| Botts               | Columbia HW                 | BC                 | 50.7986  | -116.3615 | 1              |                 | Z                |                  | 108   |
| Cedar               | Columbia HW                 | BC                 | 51.2685  | -116.9912 | 1              |                 | K                |                  | 109   |
| Driftwood           | Columbia HW                 | BC                 | 50.8700  | -116.4734 | 1              |                 | Z                |                  | 110   |
| Ladybird            | Columbia HW                 | BC                 | 49.4514  | -117.8259 | 1              |                 | V                |                  | 111   |
| Neale               | Columbia HW                 | BC                 | 51.4593  | -117.0917 | 1              |                 | Z                |                  | 112   |
| West Fisher         | Fisher                      | MT                 | 48.0537  | -115.5182 | 1              |                 | Z                |                  | 113   |
| Doctor              | Kootenai HW                 | BC                 | 50.0911  | -116.0867 | 1              |                 | Z                |                  | 114   |
| Lodgepole           | Kootenai HW                 | BC                 | 49.2819  | -114.8143 | 1              |                 | X                |                  | 115   |
| Lussier             | Kootenai HW                 | BC                 | 50.0686  | -115.5088 | 1              |                 | Z                |                  | 116   |
| Tributary to Albert | Kootenai HW                 | BC                 | 50.5663  | -115.5596 | 1              |                 | Z                |                  | 117   |
| Little Eightmile    | Lemhi                       | ID                 | 44.7685  | -113.4424 | 1              |                 | F                |                  | 118   |
| Reservoir           | Lemhi                       | ID                 | 44.7202  | -113.1261 | 1              |                 | F                |                  | 119   |
| Big                 | Lower Middle Fork Salmon    | ID                 | 45.0732  | -115.3535 | 1              |                 | Z                |                  | 120   |
| Flume               | Lower Middle Fork Salmon    | ID                 | 44.8181  | -114.5326 | 1              |                 | F                |                  | 121   |
| MF Salmon           | Lower Middle Fork Salmon    | ID                 | 44.9995  | -114.7292 | 1              |                 | F                |                  | 122   |
| NF Smith            | Lower Middle Fork Salmon    | ID                 | 45.1895  | -115.3464 | 1              |                 | F                |                  | 123   |
| WF Cedar            | Lower North Fork Clearwater | ID                 | 46.9419  | -115.8490 | 1              |                 | T                |                  | 124   |
| Albert              | Middle Clark Fork           | MT                 | 46.9743  | -114.2704 | 1              |                 | Z                |                  | 125   |
| Second              | Middle Clark Fork           | MT                 | 47.1279  | -114.7446 | 1              |                 | Z                |                  | 126   |
| Siegel              | Middle Clark Fork           | MT                 | 47.2967  | -114.7817 | 1              |                 | Z                |                  | 127   |
| Beaver              | Middle Salmon-Panther       | ID                 | 45.2825  | -114.2774 | 1              |                 | F                |                  | 128   |
| Beaver              | Middle Salmon-Panther       | ID                 | 45.2837  | -114.2854 | 1              |                 | F                |                  | 129   |
| Salmon              | Middle Salmon-Panther       | ID                 | 45.3463  | -113.9195 | 1              |                 | Z                |                  | 130   |
| Weaver              | Moyie HW                    | BC                 | 49.4034  | -116.0229 | 1              |                 | Z                |                  | 131   |
| Harvey              | NF Flathead HW              | BC                 | 49.2491  | -114.5677 | 1              |                 | Z                |                  | 132   |
| Lynx                | Oldman                      | AB                 | 49.4961  | -114.4960 | 1              |                 | Z                |                  | 133   |

| Site             | 4th-code HU <sup>1</sup> | State/<br>Province | Latitude | Longitude | <i>N</i> <sup>2</sup> | MG <sup>3</sup> | ND2 <sup>4</sup> | SNP <sup>5</sup> | Label |
|------------------|--------------------------|--------------------|----------|-----------|-----------------------|-----------------|------------------|------------------|-------|
| Oldman           | Oldman                   | AB                 | 50.0570  | -114.5917 | 1                     |                 | Z                |                  | 134   |
| Twin             | Oldman                   | AB                 | 50.1885  | -114.4420 | 1                     |                 | Z                |                  | 135   |
| Vicary           | Oldman                   | AB                 | 49.8014  | -114.4648 | 1                     |                 | Z                |                  | 136   |
| Hunt             | Priest                   | ID                 | 48.5809  | -116.7722 | 1                     |                 | AA               |                  | 137   |
| Lime             | Priest                   | ID                 | 48.8966  | -116.9642 | 1                     |                 | Z                |                  | 138   |
| Bear             | South Fork Salmon        | ID                 | 44.8332  | -115.5125 | 1                     |                 | F                |                  | 139   |
| Halfway          | South Fork Salmon        | ID                 | 44.7791  | -115.5419 | 1                     |                 | F                |                  | 140   |
| NF Coeur d'Alene | Upper Coeur d'Alene      | ID                 | 47.9586  | -116.0987 | 1                     |                 | V                |                  | 141   |
| Ross             | Upper Kootenai           | MT                 | 48.1831  | -115.9788 | 1                     |                 | K                |                  | 142   |
| WF Quartz        | Upper Kootenai           | MT                 | 48.5255  | -115.7228 | 1                     |                 | Z                |                  | 143   |
| Dagger           | Upper Middle Fork Salmon | ID                 | 44.4676  | -115.3303 | 1                     |                 | F                |                  | 144   |
| EF Sulphur       | Upper Middle Fork Salmon | ID                 | 44.5492  | -115.4636 | 1                     |                 | F                |                  | 145   |
| Garden           | Upper Middle Fork Salmon | ID                 | 44.7427  | -115.1376 | 1                     |                 | F                |                  | 146   |
| MF Salmon        | Upper Middle Fork Salmon | ID                 | 44.7304  | -115.0185 | 1                     |                 | F                |                  | 147   |
| MF Salmon        | Upper Middle Fork Salmon | ID                 | 44.5670  | -115.3007 | 1                     |                 | N                |                  | 148   |
| Alpine           | Upper Salmon             | ID                 | 43.9046  | -114.9227 | 1                     |                 | F                |                  | 149   |
| Alpine           | Upper Salmon             | ID                 | 43.9068  | -114.9322 | 1                     |                 | Z                |                  | 150   |
| Cinnibar         | Upper Salmon             | ID                 | 44.3564  | -114.4992 | 1                     |                 | F                |                  | 151   |
| Island           | Upper Salmon             | ID                 | 44.0960  | -114.5929 | 1                     |                 | Y                |                  | 152   |
| Jordan           | Upper Salmon             | ID                 | 44.4303  | -114.7272 | 1                     |                 | F                |                  | 153   |
| Morgan           | Upper Salmon             | ID                 | 44.6517  | -113.9324 | 1                     |                 | F                |                  | 154   |
| Road             | Upper Salmon             | ID                 | 44.1569  | -114.1735 | 1                     |                 | F                |                  | 155   |
| Rough            | Upper Salmon             | ID                 | 44.2413  | -114.8006 | 1                     |                 | F                |                  | 156   |
| Salmon           | Upper Salmon             | ID                 | 44.2538  | -114.5629 | 1                     |                 | F                |                  | 157   |
| Salmon           | Upper Salmon             | ID                 | 44.5447  | -114.1767 | 1                     |                 | F                |                  | 158   |
| Salmon           | Upper Salmon             | ID                 | 44.6874  | -114.0524 | 1                     |                 | F                |                  | 159   |
| Salmon           | Upper Salmon             | ID                 | 44.4258  | -114.2225 | 1                     |                 | F                |                  | 160   |



| Site                 | 4th-code HU <sup>1</sup> | State/<br>Province | Latitude | Longitude | <i>N</i> <sup>2</sup> | MG <sup>3</sup> | ND2 <sup>4</sup> | SNP <sup>5</sup> | Label |
|----------------------|--------------------------|--------------------|----------|-----------|-----------------------|-----------------|------------------|------------------|-------|
| Salmon               | Upper Salmon             | ID                 | 44.2482  | -114.5303 | 1                     |                 | U                |                  | 161   |
| Tributary to Challis | Upper Salmon             | ID                 | 44.5037  | -114.4571 | 1                     |                 | F                |                  | 162   |
| Magruder             | Upper Selway             | ID                 | 45.6854  | -114.7750 | 1                     |                 | V                |                  | 163   |
| Trapper              | Big Hole                 | MT                 | 45.6425  | -112.8711 | 9                     |                 |                  | x                | 164   |
| Little Boulder       | Bitterroot               | MT                 | 45.7288  | -114.2451 | 10                    |                 |                  | x                | 165   |
| Overwhich            | Bitterroot               | MT                 | 45.7176  | -114.0799 | 8                     |                 |                  | x                | 166   |
| WF Bitterroot        | Bitterroot               | MT                 | 45.5040  | -114.3334 | 9                     |                 |                  | x                | 167   |
| Morrell              | Blackfoot                | MT                 | 47.2992  | -113.4639 | 8                     |                 |                  | x                | 168   |
| Nevada               | Blackfoot                | MT                 | 46.8177  | -112.5681 | 9                     |                 |                  | x                | 169   |
| Snowbank             | Blackfoot                | MT                 | 47.0561  | -112.6494 | 6                     |                 |                  | x                | 170   |
| Musselshell          | Clearwater               | ID                 | 46.3524  | -115.7558 | 7                     |                 |                  | x                | 171   |
| 4th of July          | Coeur d'Alene Lake       | ID                 | 47.6106  | -116.5178 | 10                    |                 |                  | x                | 172   |
| Big Cherry           | Fisher                   | MT                 | 48.1990  | -115.5969 | 9                     |                 |                  | x                | 173   |
| Cow                  | Fisher                   | MT                 | 48.2257  | -115.2143 | 9                     |                 |                  | x                | 174   |
| West Fisher          | Fisher                   | MT                 | 48.0427  | -115.4746 | 9                     |                 |                  | x                | 175   |
| Schwartz             | Flint-Rock               | MT                 | 46.6941  | -113.8228 | 10                    |                 |                  | x                | 176   |
| MF Little Timber     | Lemhi                    | ID                 | 44.5867  | -113.4618 | 6                     |                 |                  | x                | 177   |
| Big                  | North Fork Flathead      | MT                 | 48.5269  | -114.3391 | 10                    |                 |                  | x                | 178   |
| Black Bear           | South Fork Flathead      | MT                 | 47.7446  | -113.3834 | 10                    |                 |                  | x                | 179   |
| Beaver               | St. Joe                  | ID                 | 47.0458  | -115.4580 | 9                     |                 |                  | x                | 180   |
| Bird                 | St. Joe                  | ID                 | 47.2889  | -115.5919 | 10                    |                 |                  | x                | 181   |
| Snowshoe             | Upper Clark Fork         | MT                 | 46.6860  | -112.4654 | 10                    |                 |                  | x                | 182   |
| Spotted Dog          | Upper Clark Fork         | MT                 | 46.4483  | -112.5164 | 6                     |                 |                  | x                | 183   |
| Twin Lakes           | Upper Clark Fork         | MT                 | 46.0631  | -113.2235 | 8                     |                 |                  | x                | 184   |
| Independence         | Upper Coeur d'Alene      | ID                 | 47.8806  | -116.4098 | 10                    |                 |                  | x                | 185   |
| Laverne              | Upper Coeur d'Alene      | ID                 | 47.7075  | -116.3756 | 9                     |                 |                  | x                | 186   |
| WF Eagle             | Upper Coeur d'Alene      | ID                 | 47.7367  | -115.8078 | 10                    |                 |                  | x                | 187   |

| Site    | 4th-code HU <sup>1</sup> | State/<br>Province | Latitude | Longitude | <i>N</i> <sup>2</sup> | MG <sup>3</sup> | ND2 <sup>4</sup> | SNP <sup>5</sup> | Label |
|---------|--------------------------|--------------------|----------|-----------|-----------------------|-----------------|------------------|------------------|-------|
| Rail    | Upper John Day           | OR                 | 44.3462  | -118.5664 | 30                    |                 |                  | x                | 188   |
| Roberts | Upper John Day           | OR                 | 44.3332  | -118.5781 | 22                    |                 |                  | x                | 189   |

995 <sup>1</sup>HU, hydrologic unit. For Canadian sites, this refers to the basin.

996 <sup>2</sup>*N*, sample size. Values = 1 except sites for which SNP analyses were also performed.

997 <sup>3</sup>MG, mitogenomic sequence. Bolded labels denote a haplotype is shared. All individuals were used in microsatellite analyses (except  
998 sample 44).

999 <sup>4</sup>ND2, haplotypes of NADH dehydrogenase 2.

1000 <sup>5</sup>SNP, single nucleotide polymorphism analysis.

1001 Table 2. Haplotype diversity and variation by gene for 96 westslope cutthroat trout mitogenomic  
 1002 sequences.

1003

| Gene     | Position |       | Length | H <sup>1</sup> | Genetic difference (%) | V  | Pi | Non-syn |
|----------|----------|-------|--------|----------------|------------------------|----|----|---------|
|          | Start    | End   |        |                |                        |    |    |         |
| ATPase 6 | 8113     | 8795  | 683    | 9              | 0.34 (0.15–0.59)       | 9  | 3  | 3       |
| ATPase 8 | 7955     | 8122  | 168    | 5              | 1.19 (0.60–2.38)       | 4  | 3  | 2       |
| COI      | 5475     | 7025  | 1551   | 13             | 0.33 (0.06–0.64)       | 17 | 12 | 0       |
| COII     | 7189     | 7879  | 691    | 6              | 0.27 (0.14–0.43)       | 5  | 1  | 1       |
| COIII    | 8796     | 9580  | 785    | 15             | 0.56 (0.13–1.27)       | 17 | 11 | 1       |
| Cyt b    | 14382    | 15522 | 1141   | 16             | 0.26 (0.09–0.44)       | 16 | 10 | 7       |
| ND1      | 2848     | 3822  | 975    | 17             | 0.53 (0.10–1.03)       | 20 | 10 | 6       |
| ND2      | 4035     | 5084  | 1050   | 19             | 0.50 (0.10–0.95)       | 22 | 10 | 9       |
| ND3      | 9651     | 9999  | 349    | 6              | 0.69 (0.29–1.15)       | 6  | 4  | 1       |
| ND4      | 10360    | 11740 | 1381   | 18             | 0.39 (0.07–0.80)       | 22 | 11 | 6       |
| ND4L     | 10070    | 10366 | 297    | 3              | 0.45 (0.34–0.67)       | 2  | 0  | 1       |
| ND5      | 11953    | 13791 | 1839   | 38             | 0.34 (0.05–0.87)       | 45 | 17 | 19      |
| ND6      | 13788    | 14309 | 522    | 11             | 0.44 (0.19–0.77)       | 9  | 5  | 2       |
| r12S     | 69       | 1015  | 947    | 14             | 0.24 (0.11–0.42)       | 12 | 4  |         |
| r16S     | 1088     | 2772  | 1685   | 29             | 0.25 (0.06–0.53)       | 30 | 11 |         |
| tRNA-Ala | 5159     | 5227  | 69     | 1              | 0                      | 0  | 0  |         |
| tRNA-Arg | 10000    | 10069 | 70     | 2              | 1.43                   | 1  | 0  |         |
| tRNA-Asn | 5229     | 5301  | 73     | 1              | 0                      | 0  | 0  |         |
| tRNA-Asp | 7101     | 7174  | 74     | 2              | 1.35                   | 0  | 0  |         |
| tRNA-Cys | 5336     | 5402  | 67     | 2              | 1.49                   | 1  | 0  |         |
| tRNA-Gln | 3896     | 3966  | 71     | 1              | 0                      | 0  | 0  |         |
| tRNA-Glu | 14310    | 14378 | 69     | 1              | 0                      | 0  | 0  |         |
| tRNA-Gly | 9581     | 9650  | 70     | 2              | 1.43                   | 1  | 1  |         |
| tRNA-His | 11741    | 11809 | 69     | 1              | 0                      | 0  | 0  |         |
| tRNA-Ile | 3827     | 3898  | 72     | 1              | 0                      | 0  | 0  |         |
| tRNA-Leu | 2773     | 2847  | 75     | 2              | 1.33                   | 1  | 0  |         |

|            |       |       |       |    |                  |     |     |
|------------|-------|-------|-------|----|------------------|-----|-----|
| tRNA-Leu2  | 11880 | 11952 | 73    | 1  | 0                | 0   | 0   |
| tRNA-Lys   | 7880  | 7953  | 74    | 2  | 1.35             | 1   | 0   |
| tRNA-Met   | 3966  | 4034  | 69    | 2  | 1.45             | 1   | 0   |
| tRNA-Phe   | 1     | 68    | 68    | 5  | 2.35 (1.47–2.94) | 4   | 2   |
| tRNA-Pro   | 15594 | 15663 | 70    | 1  | 0                | 0   | 0   |
| tRNA-Ser   | 7026  | 7096  | 71    | 1  | 0                | 0   | 0   |
| tRNA-Ser2  | 11810 | 11878 | 69    | 5  | 2.32 (1.45–2.90) | 4   | 1   |
| tRNA-Thr   | 15523 | 15594 | 72    | 1  | 0                | 0   | 0   |
| tRNA-Trp   | 5086  | 5157  | 72    | 2  | 1.39             | 1   | 1   |
| tRNA-Tyr   | 5403  | 5473  | 71    | 3  | 1.41             | 2   | 1   |
| tRNA-Val   | 1016  | 1087  | 72    | 2  | 1.39             | 1   | 1   |
| OL         | 5302  | 5345  | 44    | 4  | 2.27             | 2   | 1   |
| CR         | 15664 | 16676 | 1013  | 25 | 0.36 (0.10–0.89) | 16  | 9   |
| Mitogenome | 1     | 16676 | 16676 | 84 | 0.19 (0.01–0.49) | 273 | 130 |

1004 <sup>1</sup>Gene abbreviations: ATP, ATPase; CO, cytochrome *c* oxidase; Cyt b, cytochrome b; ND,  
 1005 NADH dehydrogenase; r, ribosomal RNA; tRNA, transfer RNA; OL, origin of light-strand  
 1006 replication; CR, control region.

1007 <sup>2</sup>Abbreviations: H, number of haplotypes; V, number of variables sites; Pi, number of  
 1008 parsimony-informative sites; Non-syn, number of non-synonymous mutations.

1009

1010

1011

1012 Table 3. Mean pairwise genetic divergence (%) among clades (below the diagonal) and within clades (on the diagonal).

1013

|                            | John Day | Coeur<br>d'Alene | St. Joe | North Fork<br>Clearwater | Salmon<br>A | Salmon<br>B | Clearwater<br>headwaters | Clearwater-<br>E. Cascades | Neoboreal | Missouri |
|----------------------------|----------|------------------|---------|--------------------------|-------------|-------------|--------------------------|----------------------------|-----------|----------|
| John Day                   | NA       |                  |         |                          |             |             |                          |                            |           |          |
| Coeur d'Alene              | 0.20     | 0.05             |         |                          |             |             |                          |                            |           |          |
| St. Joe                    | 0.19     | 0.10             | 0.01    |                          |             |             |                          |                            |           |          |
| North Fork<br>Clearwater   | 0.24     | 0.16             | 0.16    | 0.04                     |             |             |                          |                            |           |          |
| Salmon A                   | 0.21     | 0.13             | 0.14    | 0.11                     | 0.02        |             |                          |                            |           |          |
| Salmon B                   | 0.21     | 0.13             | 0.14    | 0.11                     | 0.05        | 0.03        |                          |                            |           |          |
| Clearwater<br>headwaters   | 0.36     | 0.41             | 0.40    | 0.44                     | 0.42        | 0.42        | 0.11                     |                            |           |          |
| Clearwater-<br>E. Cascades | 0.34     | 0.39             | 0.39    | 0.43                     | 0.40        | 0.40        | 0.14                     | 0.04                       |           |          |
| Neoboreal                  | 0.36     | 0.42             | 0.41    | 0.46                     | 0.43        | 0.43        | 0.16                     | 0.10                       | 0.04      |          |
| Missouri                   | 0.37     | 0.43             | 0.42    | 0.46                     | 0.43        | 0.44        | 0.17                     | 0.10                       | 0.04      | 0.01     |

1014

1015

1016

1017

1018 Table 4. Stocking records associated with sample sites exhibiting geographically incongruent genotypes. Data are ND2 sequences,  
 1019 mitogenomic (MG) sequences, or SNPs. Stocking information is from the online databases for Idaho  
 1020 (<https://idfg.idaho.gov/fish/stocking>) and Montana (<http://fwp.mt.gov/fishing/mFish/>).  
 1021

| Site code | Site                   | State | Data | Expected genotype      | Nearby stocking                           | Date      | Number    |
|-----------|------------------------|-------|------|------------------------|-------------------------------------------|-----------|-----------|
| 25        | Mokins                 | ID    | MG   | Coeur d'Alene          | Hayden Lake                               | 1969–2007 | 4,853,000 |
| 26        | NF St. Joe             | ID    | MG   | St. Joe                | St. Joe River                             | 1968–1973 | 235,000   |
| 29        | Dry Wolf               | MT    | MG   | Missouri               | No data                                   |           |           |
| 32        | Tributary of Armstrong | ID    | MG   | Coeur d'Alene          | Coeur d'Alene Lake                        | 1967–1969 | 73,000    |
| 41        | Bad Luck               | ID    | MG   | Clearwater headwaters  | Canyon Creek Lakes, White Cap Creek Lakes | 1968–2008 | 83,000    |
| 48        | Morse <sup>2</sup>     | ID    | SNP  | Salmon                 | No data                                   |           |           |
| 55        | Leiberg                | ID    | MG   | Coeur d'Alene          | Coeur d'Alene River                       | 1968–1972 | 153,000   |
| 59        | Yoosa <sup>1</sup>     | ID    | MG   | Clearwater-E. Cascades | No data                                   |           |           |
| 65        | EF Emerald             | ID    | MG   | St. Joe                | No data                                   |           |           |
| 89        | Twin                   | ID    | MG   | Salmon B               | Twin Creek, WF Bear Creek                 | 1990–2008 | 1,500     |
| 120       | Big                    | ID    | ND2  | NF Clearwater-Salmon   | Belvidere Lakes                           | 1971–1989 | 26,000    |
| 130       | Salmon                 | ID    | ND2  | NF Clearwater-Salmon   | No data                                   |           |           |
| 141       | NF Coeur d'Alene       | ID    | ND2  | Coeur d'Alene          | LNF Coeur d'Alene River, Spruce Creek     | 1968–1972 | 264,000   |
| 150       | Alpine                 | ID    | ND2  | NF Clearwater-Salmon   | Alpine Creek Lakes                        | 1970–2009 | 44,000    |
| 152       | Island                 | ID    | ND2  | NF Clearwater-Salmon   | Island Lake                               | 1969–1999 | 14,000    |
| 163       | Magruder               | ID    | ND2  | Clearwater-E. Cascades | Gold Pan Lake                             | 1968–1994 | 18,000    |
| 164       | Trapper                | MT    | SNP  | Missouri               | No data                                   |           |           |
| 177       | MF Little Timber       | ID    | SNP  | Salmon                 | NF Little Timber Lakes                    | 1983–1986 | 500       |

1022 <sup>1</sup>All fish in the SNP analysis clustered as expected.

1023 <sup>2</sup>The fish in the mitogenomic analysis clustered as expected.

1024

1025

1026 Table 5. Proposed units of conservation for westslope cutthroat trout.

1027

1028

---

| Name                        | Location                                                                                                                                                               | Evidence <sup>1</sup>         |
|-----------------------------|------------------------------------------------------------------------------------------------------------------------------------------------------------------------|-------------------------------|
| John Day                    | Upper portion of the John Day River basin                                                                                                                              | G, MG, MS, SNP                |
| Coeur d'Alene               | Upper portion of the Coeur d'Alene River basin                                                                                                                         | G, MG                         |
| St. Joe                     | Upper portion of the St. Joe River basin                                                                                                                               | G, MG                         |
| North Fork Clearwater       | Upper portion of the North Fork Clearwater River                                                                                                                       | G, MG, ND2 (in part)          |
| Salmon                      | Salmon River basin                                                                                                                                                     | G, MG, ND2 (in part), MS, SNP |
| Clearwater headwaters       | Headwaters of the Selway and South Fork Clearwater Rivers                                                                                                              | G, MG                         |
| Clearwater-eastern Cascades | Lochsa River, lower Selway River, and lower portions of tributaries to the Middle Fork Clearwater River, and the Wenatchee River, Lake Chelan, and Methow River basins | G (in part), MG, MS, SNP      |
| Neoboreal                   | Columbia River basin from the Sanpoil River upstream (excluding the Spokane River), Fraser River basin, and the South Saskatchewan River basin                         | G, MG, ND2 (in part), MS, SNP |
| Missouri                    | Missouri River basin                                                                                                                                                   | G, MG, MS, SNP                |

---

1029 <sup>1</sup>Evidence is from geographic discreteness (G), mitogenomic sequences (MG), microsatellites (MS), or single nucleotide  
 1030 polymorphisms (SNP).

1031

1032

1033 Figure captions.

1034

1035 Figure 1. Sample locations, river basins, and units of conservation within the historical range of  
1036 westslope cutthroat trout. (A) Sources of westslope cutthroat trout specimens that were  
1037 genetically analyzed using mitogenomic sequences and microsatellites (squares), ND2 sequences  
1038 (diamonds), or SNPs (circles). Fish from some locations were analyzed using more than one  
1039 method. Major river basins are: 1, John Day; 2, Clearwater; 3, North Fork Clearwater; 4,  
1040 Salmon; 5, St. Joe; 6, Coeur d'Alene; 7, Wenatchee River, Lake Chelan, and Methow River in  
1041 the eastern Cascades; 8, Pend Oreille; 9, Kootenai; 10, Clark Fork; 11, Bitterroot; 12, Blackfoot;  
1042 13, Flathead; 14, Bow (north) and Oldman (south) Rivers in the South Saskatchewan; and 15,  
1043 Missouri. (B) Extent of proposed units of conservation. Colored polygons correspond to those  
1044 identifying mitogenomic clades (Salmon River clades are combined). The dotted red line denotes  
1045 the Continental Divide.

1046

1047 Figure 2. Maximum-likelihood phylogeny of individual mitogenomic haplotypes ( $n = 89$ ) of  
1048 westslope cutthroat trout from across its historical range. Support (as a percentage, based on  
1049 1,000 bootstraps) is given above each node. Only support  $> 70\%$  is shown. Mitogenomic clades  
1050 discussed in the text are identified by a unique color. Sample labels are in Table 1.

1051

1052 Figure 3. Neighbor-joining phylogeny of individual ND2 haplotypes ( $n = 27$ ) of westslope  
1053 cutthroat trout from across its historical range. Support (as a percentage, based on 1,000  
1054 bootstraps) is given above each node. Only support  $> 70\%$  is shown. Mitogenomic clades  
1055 discussed in the text are identified by a unique color. ND2 haplotype labels are in Table 1.

1056

1057 Figure 4. Assignment of westslope cutthroat trout ( $n = 524$ ) to  $K = 4, 8,$  or  $15$  genetic clusters  
1058 analyzed at 52 variable SNP loci using STRUCTURE. Each individual (denoted by a single bar) is  
1059 represented by the proportion of their genotype that was assigned to each of  $K$  clusters. Samples  
1060 are sorted geographically by basin, but STRUCTURE was run with no geographic priors. The left  
1061 vertical axis identifies major drainage basins of each sample and the right vertical axis the  
1062 mitogenomic clades. Clades for the North Fork Clearwater River and Clearwater River



1063 headwaters were not included because no fish from these areas were examined in the SNP  
1064 analysis.

1065

1066 Figure 5. Assignment of westslope cutthroat trout ( $n = 95$ ) to  $K = 5$  genetic clusters analyzed at  
1067 10 microsatellite loci using STRUCTURE. Each individual (denoted by a single bar) is represented  
1068 by the proportion of their genotype that was assigned to each of  $K$  clusters. Samples are sorted  
1069 geographically by basin, but STRUCTURE was run with no geographic priors. The left vertical axis  
1070 identifies major drainage basins of each sample.

1071

1072

1073

1074

1075

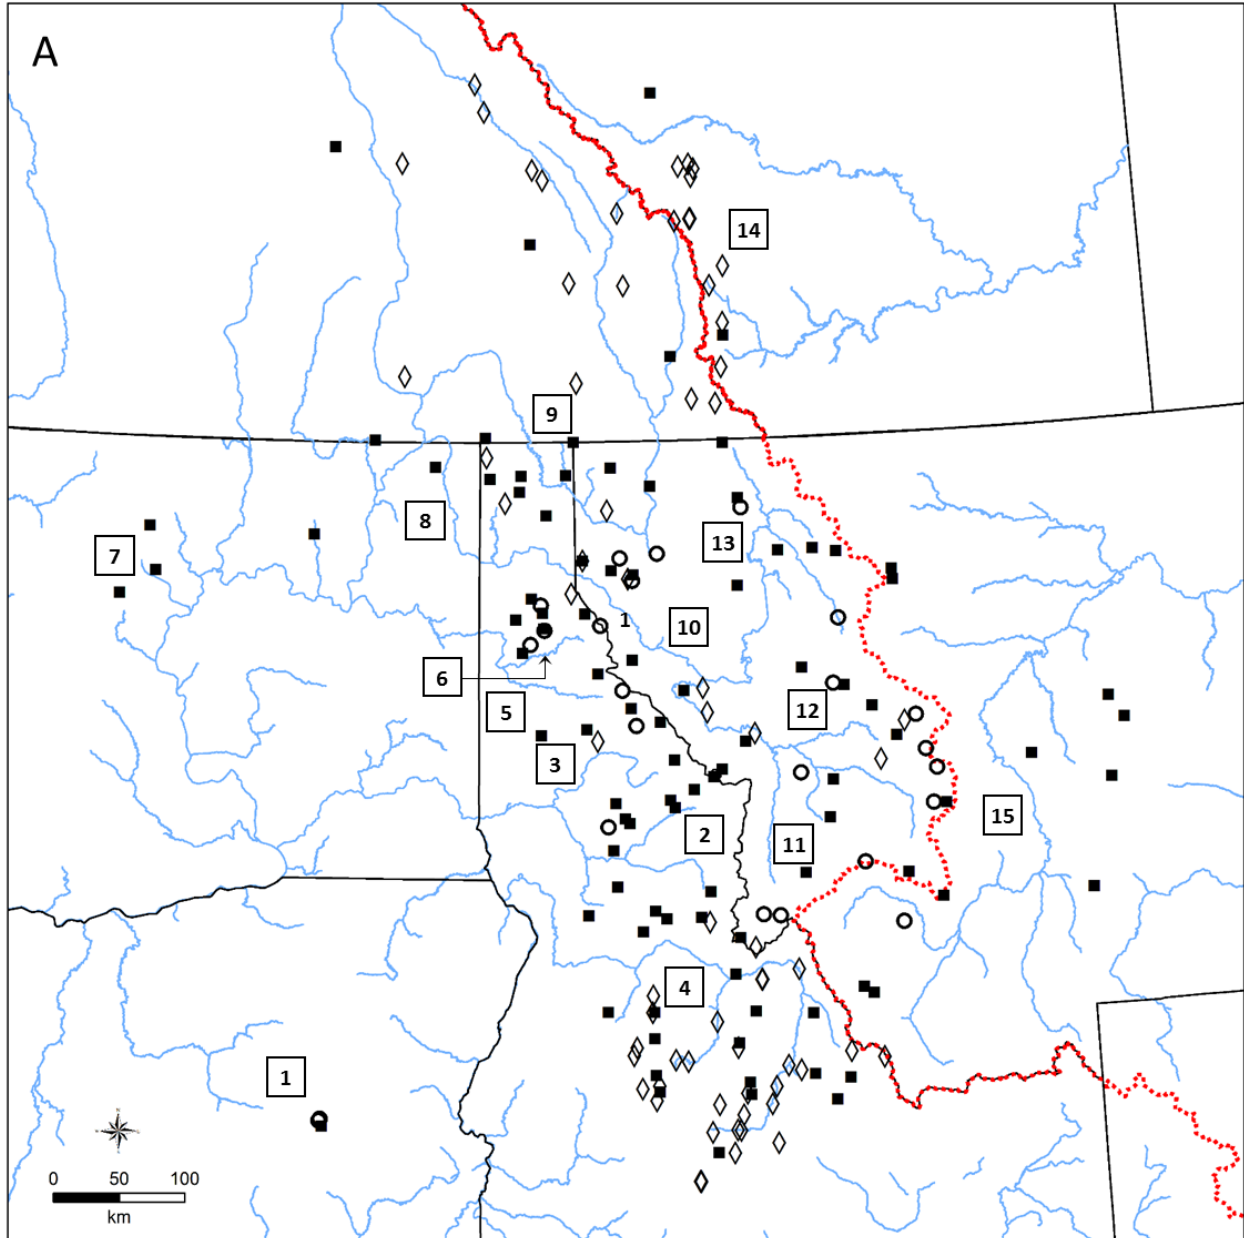

1076

1077

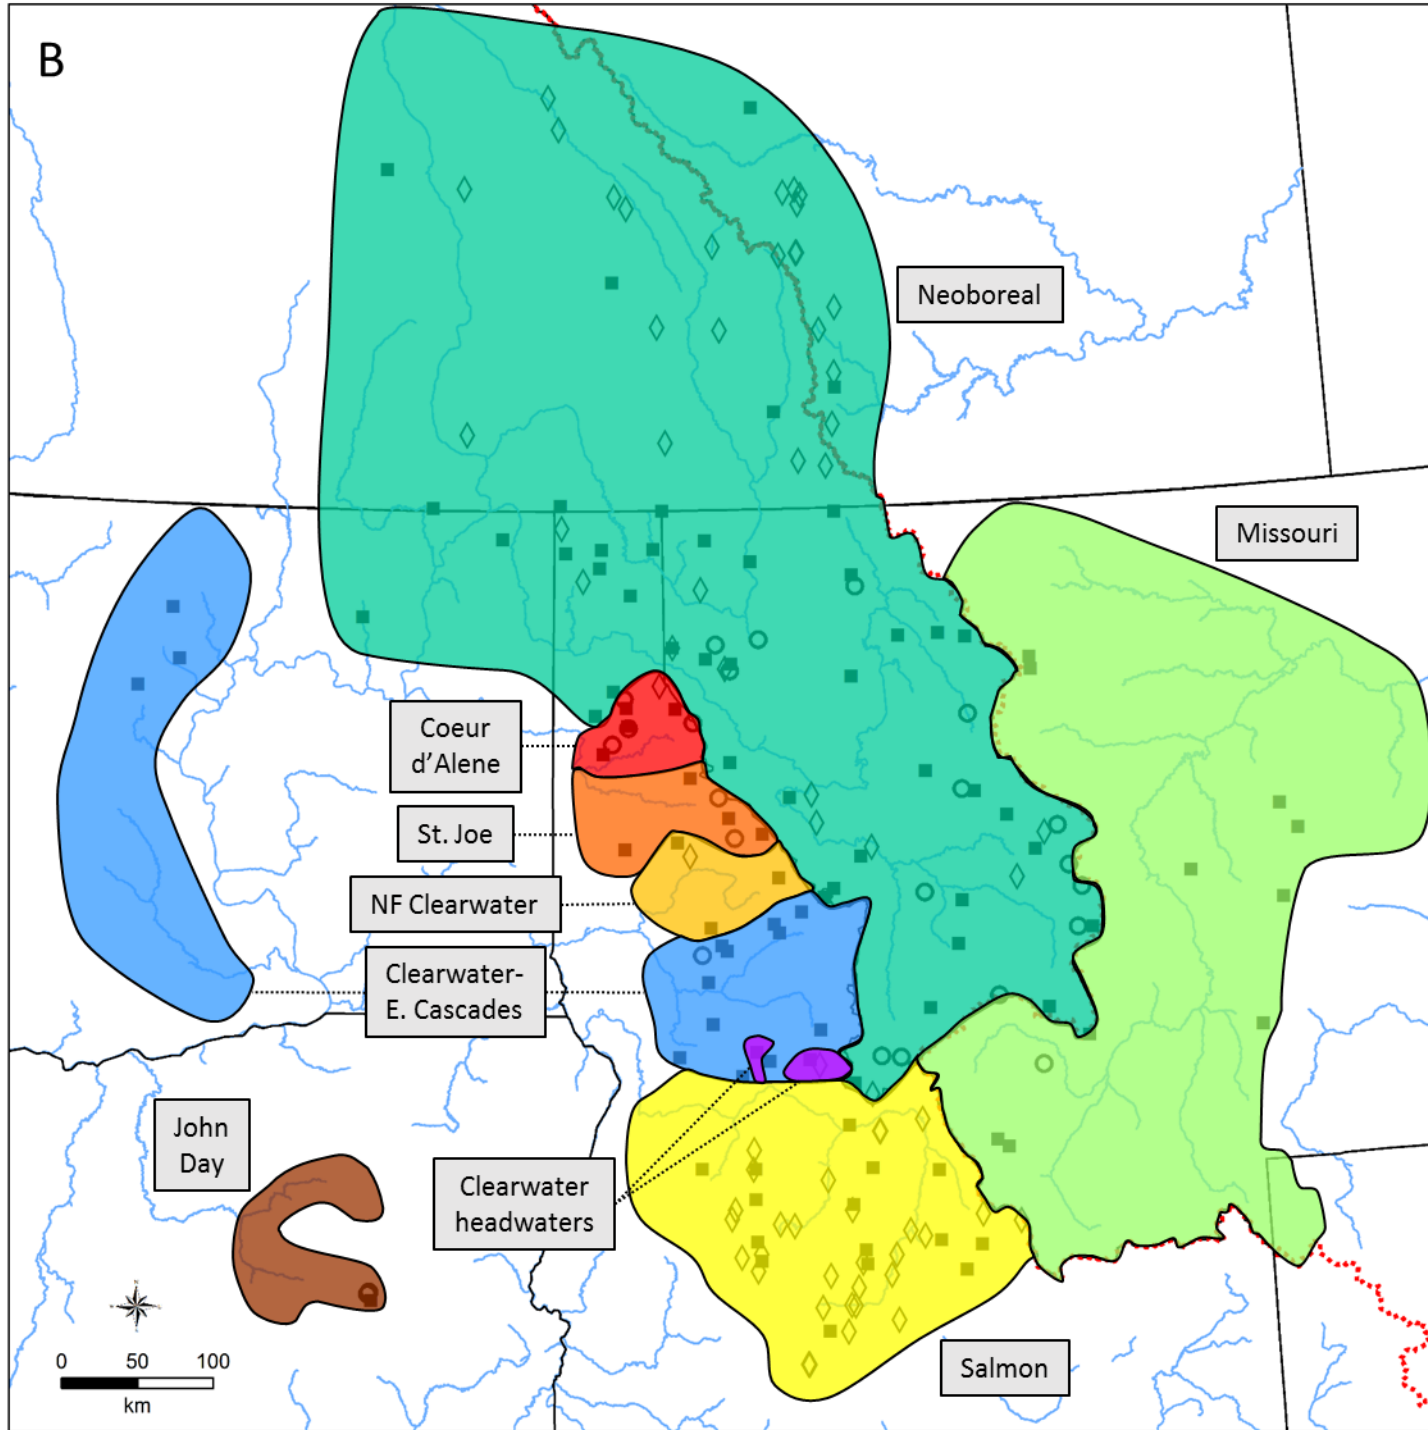

1078

1079

1080

1081

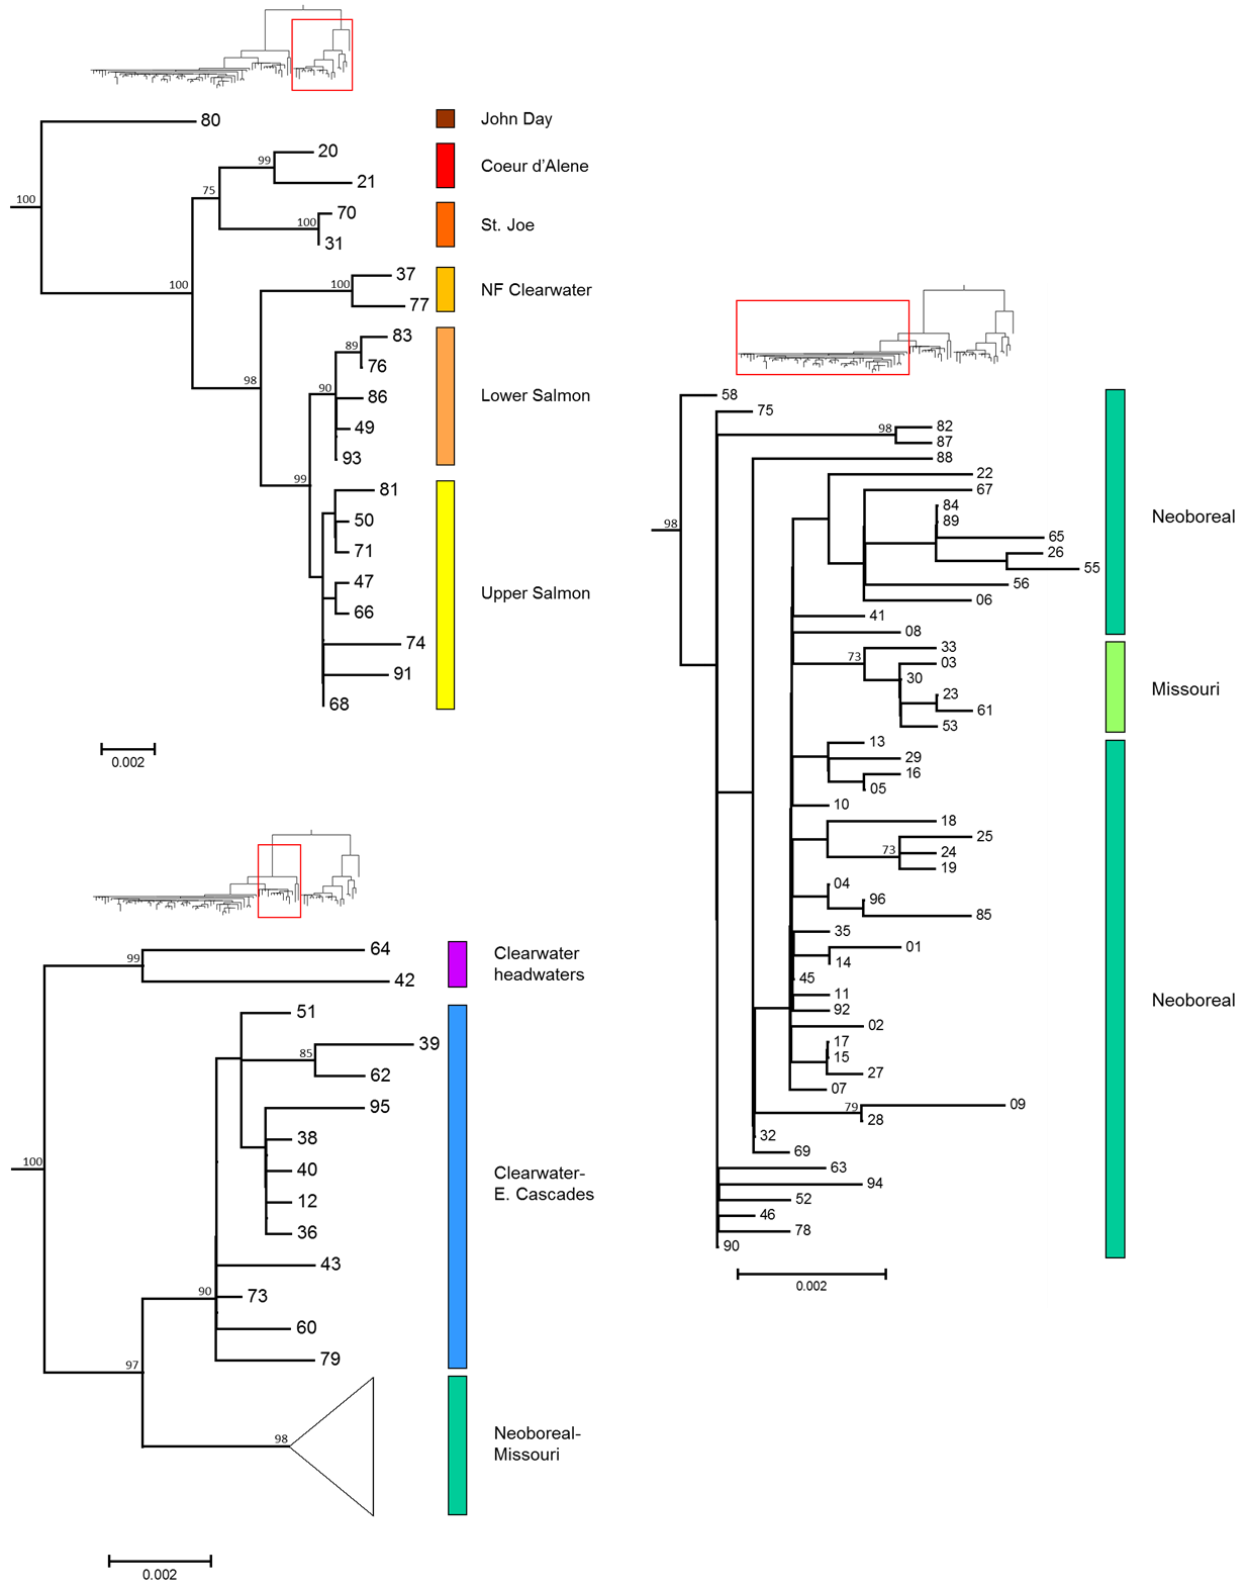

1082

1083

1084

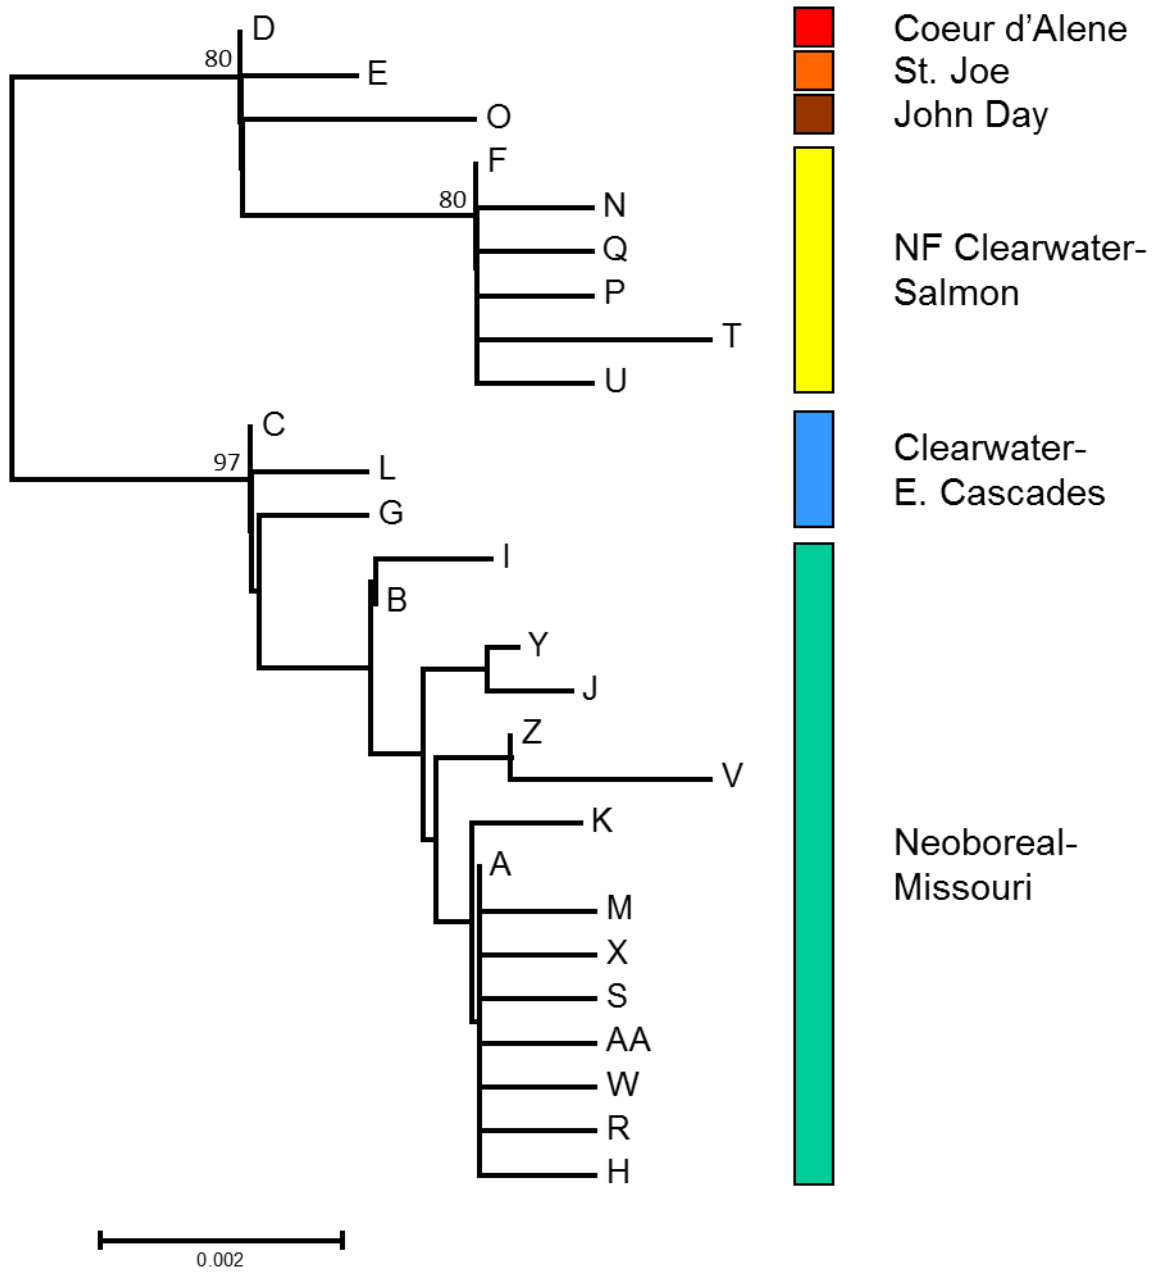

1085  
1086

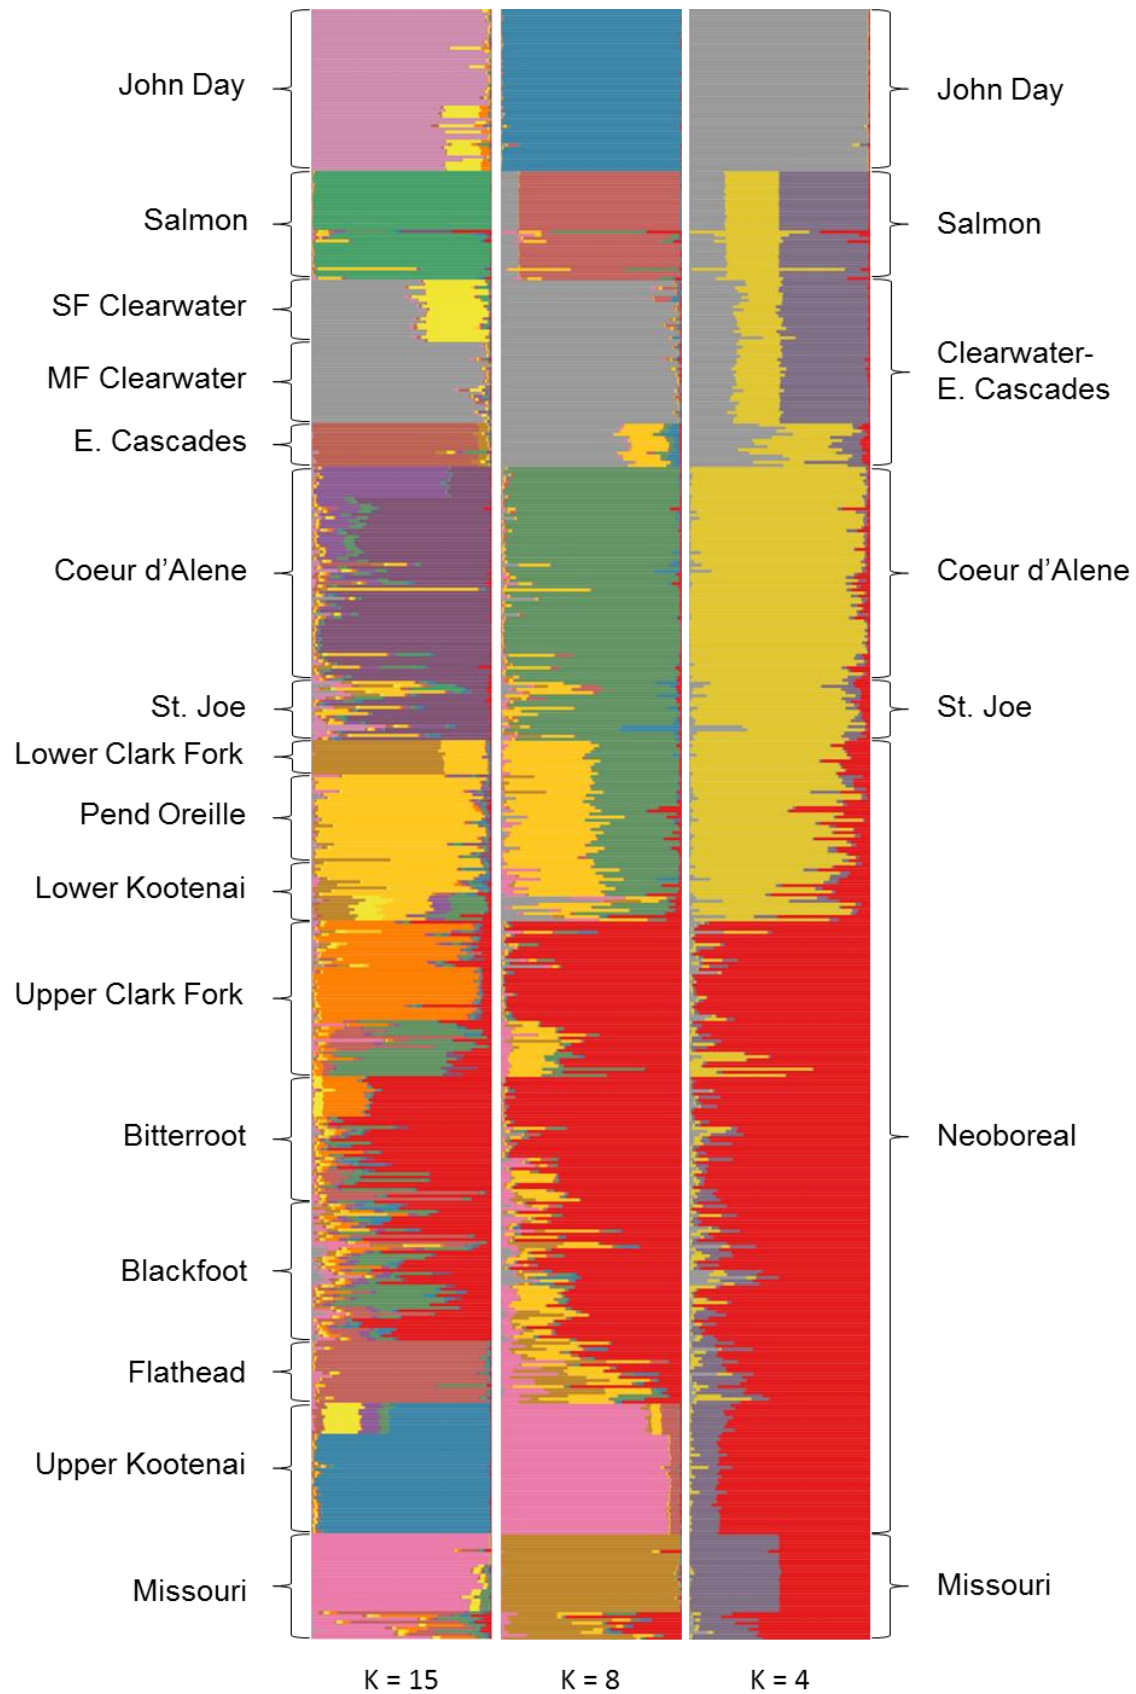

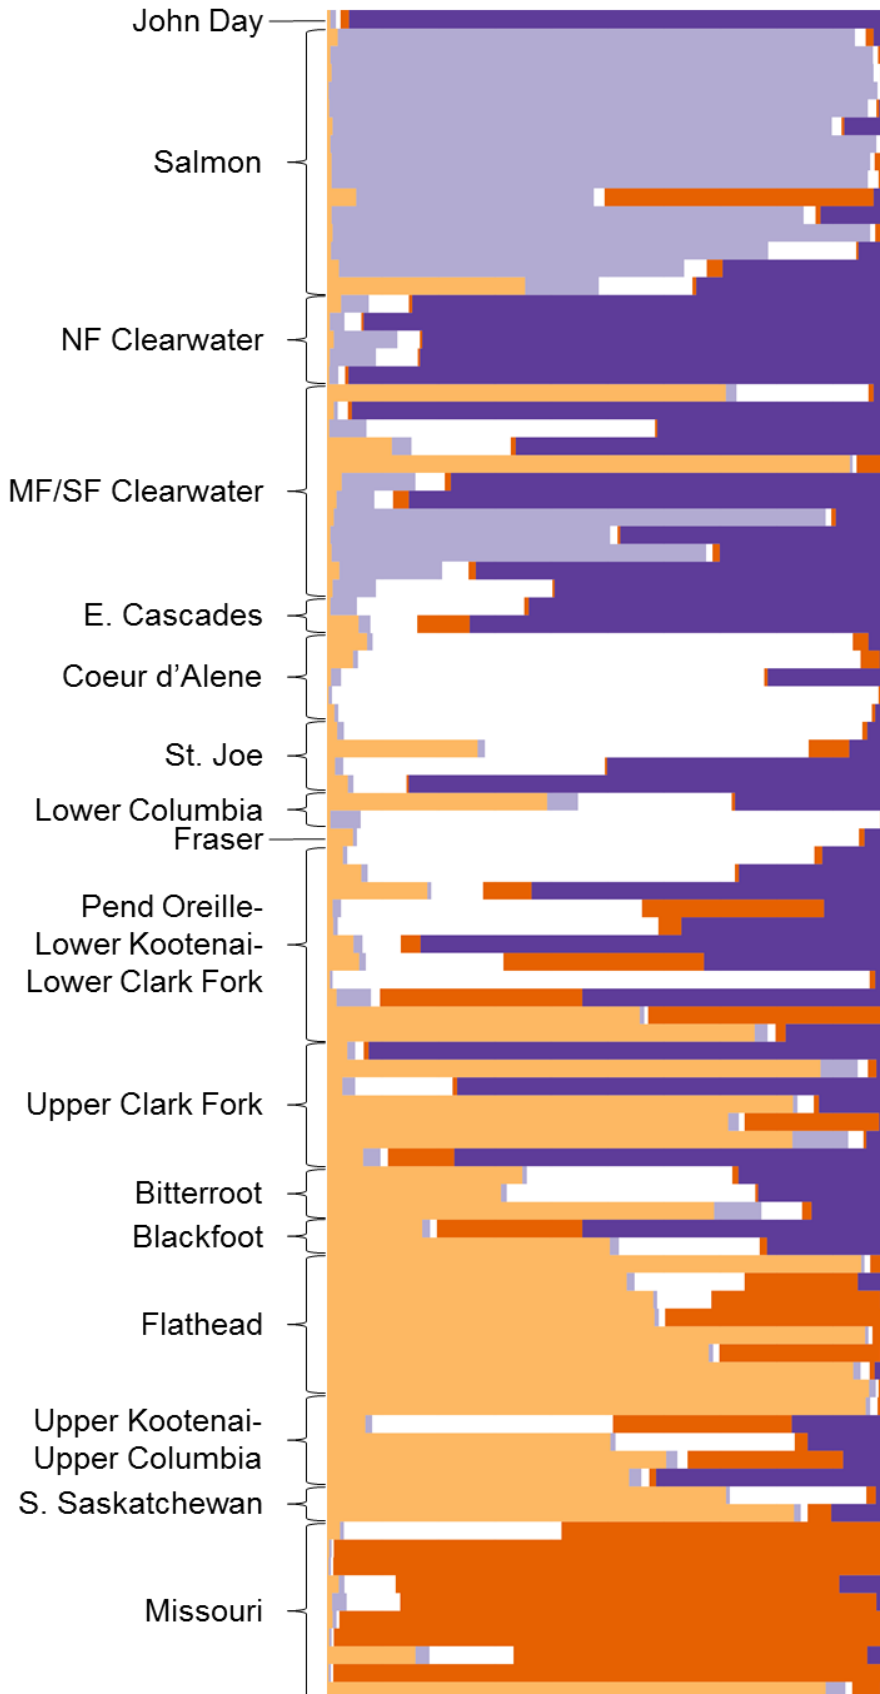

Source: https://www.biorxiv.org/content/10.1101/213363v2.full.pdf
